# Supplementary material for: Butyrophilin-like 3 Directly Binds a Human Vγ4+ T Cell Receptor Using a Modality Distinct from Clonally-Restricted Antigen
Source: PubMed Central journal article supplement (PMC6868513; doi:10.1016/j.immuni.2019.09.006), 2019-11-19
Supplement: mmc2.pdf [file mmc2.pdf]

# Immunity

## Butyrophilin-like 3 Directly Binds a Human $V\gamma 4^+$ T Cell Receptor Using a Modality Distinct from Clonally-Restricted Antigen

### Graphical Abstract

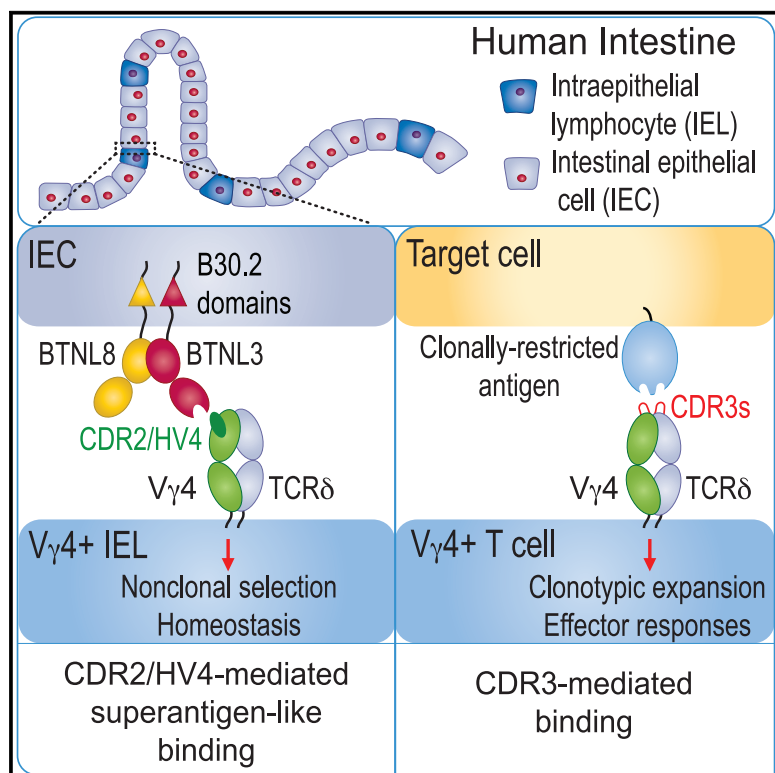

### Authors

Carrie R. Willcox, Pierre Vantourout, Mahboob Salim, ..., Fiyaz Mohammed, Adrian C. Hayday, Benjamin E. Willcox

### Correspondence

adrian.hayday@kcl.ac.uk (A.C.H.), b.willcox@bham.ac.uk (B.E.W.)

### In Brief

Butyrophilin (BTN) and butyrophilin-like (BTNL) molecules powerfully influence selection and activation of specific  $\gamma\delta$  lymphocyte subsets, but whether they directly bind the  $\gamma\delta$  TCR has remained contentious. Willcox et al. show that BTNL3 directly binds to human  $V\gamma 4^+$  TCRs via a superantigen-like binding mode that is focused on germline-encoded TCR regions.

### Highlights

- BTNL3 binds directly and specifically to  $V\gamma 4^+$  TCRs via its IgV domain
- The superantigen-like binding mode focuses on germline-encoded TCR regions
- In contrast,  $\gamma\delta$  TCR binding to a clonally restricted antigen is CDR3-mediated
- Mutagenesis indicates parallels with BTN3A1-mediated activation of  $V\gamma 9V\delta 2$  T cells

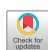

# Butyrophilin-like 3 Directly Binds a Human $V\gamma 4^+$ T Cell Receptor Using a Modality Distinct from Clonally-Restricted Antigen

Carrie R. Willcox,<sup>1,2,8</sup> Pierre Vantourout,<sup>3,4,8</sup> Mahboob Salim,<sup>1,2</sup> Iva Zlatareva,<sup>3,4</sup> Daisy Melandri,<sup>3,4</sup> Leonor Zanardo,<sup>1,2,5</sup> Roger George,<sup>6</sup> Svend Kjaer,<sup>6</sup> Mark Jeeves,<sup>7</sup> Fiyaz Mohammed,<sup>1,2</sup> Adrian C. Hayday,<sup>3,4,\*</sup> and Benjamin E. Willcox<sup>1,2,9,\*</sup>

<sup>1</sup>Institute of Immunology and Immunotherapy, University of Birmingham, Birmingham, UK

<sup>2</sup>Cancer Immunology and Immunotherapy Centre, University of Birmingham, Birmingham, UK

<sup>3</sup>Peter Gorer Department of Immunobiology, School of Immunology and Microbial Sciences, King's College London, London, UK

<sup>4</sup>Immunosurveillance Laboratory, The Francis Crick Institute, London, UK

<sup>5</sup>Faculty of Medicine, University of Tours, Tours, France

<sup>6</sup>Structural Biology Team, The Francis Crick Institute, London, UK

<sup>7</sup>Henry Wellcome Building for NMR, Institute of Cancer and Genomic Sciences, University of Birmingham, Birmingham, UK

<sup>8</sup>These authors contributed equally

<sup>9</sup>Lead Contact

\*Correspondence: [adrian.hayday@kcl.ac.uk](mailto:adrian.hayday@kcl.ac.uk) (A.C.H.), [b.willcox@bham.ac.uk](mailto:b.willcox@bham.ac.uk) (B.E.W.)

<https://doi.org/10.1016/j.immuni.2019.09.006>

## SUMMARY

Butyrophilin (BTN) and butyrophilin-like (BTNL/Btnl) heteromers are major regulators of human and mouse  $\gamma\delta$  T cell subsets, but considerable contention surrounds whether they represent direct  $\gamma\delta$  T cell receptor (TCR) ligands. We demonstrate that the BTNL3 IgV domain binds directly and specifically to a human  $V\gamma 4^+$  TCR, “LES” with an affinity ( $\sim 15$ – $25 \mu\text{M}$ ) comparable to many  $\alpha\beta$  TCR-peptide major histocompatibility complex interactions. Mutations in germline-encoded  $V\gamma 4$  CDR2 and HV4 loops, but not in somatically recombined CDR3 loops, drastically diminished binding and T cell responsiveness to BTNL3-BTNL8-expressing cells. Conversely, CDR3 $\gamma$  and CDR3 $\delta$  loops mediated LES TCR binding to endothelial protein C receptor, a clonally restricted autoantigen, with minimal CDR1, CDR2, or HV4 contributions. Thus, the  $\gamma\delta$  TCR can employ two discrete binding modalities: a non-clonotypic, superantigen-like interaction mediating subset-specific regulation by BTNL/BTN molecules and CDR3-dependent, antibody-like interactions mediating adaptive  $\gamma\delta$  T cell biology. How these findings might broadly apply to  $\gamma\delta$  T cell regulation is also examined.

## INTRODUCTION

$\gamma\delta$  T cells seemingly make both innate-like and adaptive contributions to immunity, with increasingly appreciated relevance to clinical scenarios such as cancer surveillance. Prototypic innate-like  $\gamma\delta$  T cell subtypes include mouse dendritic epidermal T cells (DETCs), which are skin-restricted, feature a canonical T cell receptor (TCR) repertoire (Asarnow et al., 1988), and mediate responses to dysregulated target cells in the absence

of foreign adjuvants or antigens (Strid et al., 2008). Indeed, DETC-deficient mice show increased susceptibility to skin carcinogenesis (Girardi et al., 2001). In humans, a limited TCR repertoire is likewise expressed by a major subset of  $V\gamma 9V\delta 2$  T cells (Delfau et al., 1992), which are preferentially enriched in peripheral blood, display an effector phenotype (Parker et al., 1990), and show potent cytotoxicity and cytokine production. Given that they respond *en masse* to microbial phosphoantigens (P-Ags) (Morita et al., 2007), the  $V\gamma 9V\delta 2$  subset likely provides an early line of defense against certain microbial infections, such as those involving eubacterial and mycobacterial species that produce the highly potent P-Ag (E)-4-hydroxy-3-methylbut-2-enyl pyrophosphate (HMBPP). Conversely, adaptive paradigms seem most able to explain conspicuous clonal expansions and effector differentiation of subsets of human  $V\delta 2^{\text{neg}}$  T cells and  $V\gamma 9^{\text{neg}}V\delta 2$  T cells, including after exposure to viral infection (Davey et al., 2017, 2018b; Ravens et al., 2017).

Few direct ligands of the  $\gamma\delta$  TCRs underpinning innate-like or adaptive responses are known. Adaptive processes highlight powerful clonotypic focusing even within specific V region subsets (e.g.,  $V\delta 1$  T cells,  $V\delta 1^{\text{neg}}V\delta 2^{\text{neg}}$  T cells, and  $V\gamma 9^{\text{neg}}V\delta 2$  T cells), strongly suggesting that somatically recombined CDR3 regions are involved (Davey et al., 2018a). Moreover, a diverse range of ligands has been proposed for such populations, including those few supported by evidence of direct TCR-ligand interaction, many of which favor roles for CDR3 residues (Willcox and Willcox, 2019).

At the same time, molecules closely related to the B7 family of lymphocyte co-regulators (which include CD80, ICOS-L, and PDL1) have emerged as critical players in  $\gamma\delta$  T cell selection, activation, and possibly tissue-associated functions (Abeler-Dörner et al., 2012). The first of these to be identified was Skint1, a hitherto uncharacterized BTNL molecule crucial for thymic selection of  $V\gamma 5^+$  DETC and expressed by keratinocytes (Boyden et al., 2008). Subsequently, expression of the human BTN3A1 molecule on target cells was established as critical for P-Ag-mediated activation of human peripheral blood  $V\gamma 9V\delta 2^+$  T cells (Harly et al., 2012; Vavassori et al., 2013). More recently, mouse

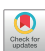

Btl1 emerged as critical for the extrathymic selection of the signature  $V\gamma 7^+$  intestinal intraepithelial lymphocyte (IEL) population (Di Marco Barros et al., 2016). Btl1 and Btl6 molecules are both expressed by differentiated enterocytes (Di Marco Barros et al., 2016), wherein they form a co-complex (Lebrero-Fernández et al., 2016a; Vantourout et al., 2018) that can specifically regulate mature  $V\gamma 7^+$  IEL *in vitro*. Likewise, human BTNL3 and BTNL8, which are both enriched in expression in gut epithelium (Di Marco Barros et al., 2016; Lebrero-Fernández et al., 2016b), are major regulators of signature human intestinal  $V\gamma 4^+$  T cells (Di Marco Barros et al., 2016; Melandri et al., 2018) and are capable of inducing TCR downregulation specifically in this subset. The potential pathophysiologic significance of the  $V\gamma 4^+$  T cell subset was highlighted recently by a report that disruption of the  $V\gamma 4^+$ -BTNL3.8 axis is pathognomonic for celiac disease (Mayassi et al., 2019). More generally, TCR  $\gamma\delta$  IELs have been increasingly implicated in the regulation of tissue maintenance, including protection from infection, inflammation, and internal dysregulation (Edelblum et al., 2015; He et al., 2019; Hoytema van Konijnenburg et al., 2017). Thus, deficiencies in signature, tissue-resident  $\gamma\delta$  T cell compartments have been causally linked to cancer and tissue inflammation (Girardi et al., 2002; Roberts et al., 1996; Strid et al., 2008).

Soon after their discovery, when  $\gamma\delta$  T cells were first found to express a limited number of V regions, the existence of a range of host-encoded ligands that might mediate subset-specific  $\gamma\delta$  T cell selection and/or activation was hypothesized (Janeway et al., 1988). Clearly, the observations outlined earlier highlight BTN and BTNL molecules as strong candidates for being direct, subset-specific  $\gamma\delta$  TCR ligands. Nevertheless, the only study reporting direct binding of a TCR ( $V\gamma 9V\delta 2$ ) to a BTN or BTNL molecule (BTN3A1) (Vavassori et al., 2013) has been strongly disputed (Sandstrom et al., 2014), with its claim of P-Ag presentation by the BTN3A1 V domain being ascribed to electron density arising from crystallization components (Sandstrom et al., 2014). Indeed, other data demonstrate that BTN3A1 can directly bind P-Ag in its C-terminal B30.2 domain (Hsiao et al., 2014; Salim et al., 2017; Sandstrom et al., 2014). Altogether, compelling evidence that any BTN, BTNL, or Btl molecule acts as a direct ligand for the  $\gamma\delta$  TCR is lacking, leaving uncertainty about how these molecules may achieve their profound biological effects. Indeed, the possibility has remained that BTN and BTNL molecules may act indirectly, for example, as chaperones or inducers for direct TCR ligands that are as yet unidentified.

Here we provide unequivocal evidence for direct binding of a  $\gamma\delta$  TCR to a BTNL protein. We show that a human  $V\gamma 4$  TCR binds the BTNL3 IgV domain via germline-encoded regions, somewhat analogous to superantigen binding to an  $\alpha\beta$  TCR. In contrast, binding of a clonally restricted ligand to the same  $V\gamma 4$  TCR was critically influenced by the CDR3 regions of the  $\gamma\delta$  TCR, consistent with its adaptive biology. Thus, we highlight two distinct and complementary modalities for ligand interaction: one involving a BTNL molecule in  $V\gamma$  region-specific regulation of tissue-restricted  $\gamma\delta$  T cell subsets and the other involving highly specific, clonally restricted ligand recognition, underpinning adaptive  $\gamma\delta$  T cell responses. Moreover, the two binding modes may extend to BTN3A1-mediated regulation of the human blood  $V\gamma 9V\delta 2$  subset by P-Ags, suggesting broad significance of the BTNL modality that we outline.

## RESULTS

### The BTNL3 IgV Domain Directly and Specifically Binds $V\gamma 4$ TCRs

Previously, we demonstrated that exposure of Jurkat cells transduced with  $V\gamma 4^+$   $\gamma\delta$  TCRs to 293T cells expressing BTNL3.8 heterodimers (293T.L3L8) led to CD69 upregulation and TCR downregulation, consistent with TCR triggering (Melandri et al., 2018). Moreover, soluble  $V\gamma 4$  TCRs were found to specifically stain the surface of 293T.L3L8 target cells, but not control cells transduced with empty vector (293T.EV), suggesting that BTNL3.8 heterodimers either were  $V\gamma 4$  TCR ligands or induced the display of as-yet-unidentified  $V\gamma 4$  TCR ligands. Consistent with either possibility, mutagenesis of the BTNL3.8 heterodimer showed that  $V\gamma 4$ -mediated TCR triggering depended on the BTNL3 IgV domain.

To address the hypothesis that BTNL heterodimers directly bound the TCR, we generated recombinant BTNL3 and BTNL8 IgV domains and tested interaction with a range of soluble  $\gamma\delta$  TCRs (Willcox et al., 2012) using surface plasmon resonance (SPR). We overexpressed both BTNL IgV domains separately in *E. coli* and then renatured them by dilution refolding, with yields broadly similar to those of other B7-like IgV domains, such as Skint1 (Salim et al., 2016) (STAR Methods). Of note, BTNL3 IgV was highly susceptible to oxidation when solubilized in denaturant, and its correct refolding depended on full reduction before refolding and choice of oxido-reduction couple during renaturation. Refolding was also impaired by some C-terminal tag sequences, although not by a 6×His tag.

Injection of BTNL3 over immobilized  $V\gamma 4$  TCR resulted in substantially greater signals than over immobilized  $V\gamma 2$  or  $V\gamma 3$  TCRs, indicating  $V\gamma 4$ -specific TCR binding (Figure 1A). In contrast, signals resulting from injection of BTNL8 IgV over surfaces with immobilized  $V\gamma 2$ ,  $V\gamma 3$ , and  $V\gamma 4$  TCRs matched those over control surfaces, indicating that in contrast to BTNL3 IgV, BTNL8 IgV did not directly bind the  $V\gamma 4$  TCR (Figure 1B). This was consistent with genetic data implicating BTNL3 more than BTNL8 in promoting  $V\gamma 4$  TCR triggering (Melandri et al., 2018). Equilibrium binding measurements (Figure S1A) indicated the affinity ( $K_d$ ) of BTNL3 IgV for a  $V\gamma 4$  TCR, LES, was  $\sim 15$ – $25$   $\mu\text{M}$  (average  $20.7 \pm 4.8$   $\mu\text{M}$ ,  $n = 15$ ) at  $25^\circ\text{C}$  (Figure 1C; Figure S1A). Isothermal titration calorimetry (ITC) measurements confirmed  $V\gamma 4$  TCR specifically bound to BTNL3 IgV, with a broadly similar affinity ( $3.5$   $\mu\text{M}$  at  $20^\circ\text{C}$ ), and indicated the interaction was enthalpically driven ( $\Delta H^\circ = -8.1$   $\text{kcal}\cdot\text{mol}^{-1}$  at  $20^\circ\text{C}$ ) and marginally entropically unfavorable ( $\Delta S^\circ = -0.77$   $\text{kcal}\cdot\text{mol}^{-1}$  at  $20^\circ\text{C}$ ) (Figures 1D and 1E). In contrast, no binding was observed with a  $V\gamma 2^+$  or  $V\gamma 3^+$  TCR (Figure 1E; Figures S1B and S1C).

Consistent with our finding that BTNL3 IgV, but not BTNL8 IgV, directly bound  $V\gamma 4$  TCRs, soluble  $V\gamma 4$  TCR binding to 293T cells transduced with FLAG (N-terminal)-BTNL3 and hemagglutinin (HA) (N-terminal)-BTNL8 heterodimer constructs was abrogated by anti-FLAG antibody, presumably because of steric hindrance, but was only marginally affected by anti-HA antibody (Figure 1F; Figure S1D). Anti-FLAG antibody, but not anti-HA antibody, also inhibited activation of JRT3  $V\gamma 4V\delta 1$  TCR transductants by 293T cells transduced with FLAG-BTNL3.HA-BTNL8 (Figures S1E–S1G).

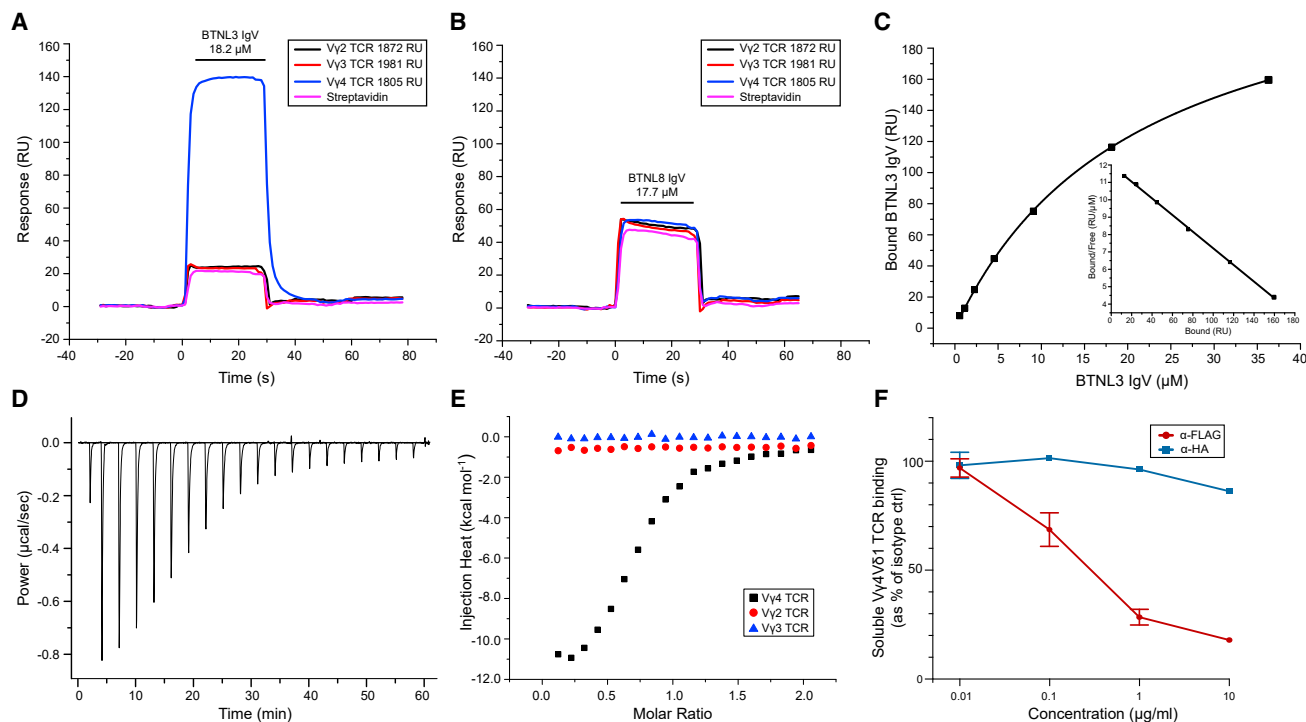

**Figure 1. Human BTNL3 IgV Binds Specifically to V $\gamma$ 4 TCRs**

(A and B) SPR analysis of BTNL3 IgV (A; 18.2  $\mu$ M) or BTNL8 IgV (B; 17.7  $\mu$ M) injected (small horizontal bar) over biotinylated V $\gamma$ 4 TCR (1,805 RU), V $\gamma$ 3 TCR (1,981 RU), or V $\gamma$ 2 TCR (1,872 RU) or streptavidin alone. Responses presented as resonance units (RUs). Data are representative of 15 experiments (A) or two experiments (B).

(C) Equilibrium affinity analysis of the binding of BTNL3 IgV to V $\gamma$ 4 TCR ( $K_d = 22.1 \mu$ M); inset, Scatchard plot of the same data ( $K_d = 20.9 \mu$ M).

(D) ITC analysis of the BTNL3 IgV domain interaction with V $\gamma$ 4 TCR ( $K_d = 3.5 \mu$ M).

(E) ITC analysis indicates no interaction of the BTNL3 IgV domain with control V $\gamma$ 2<sup>+</sup> or V $\gamma$ 3<sup>+</sup> TCRs.

(F) Quantitation of effects of anti-FLAG and anti-HA antibodies on the staining of 293T cells expressing FLAG-BTNL3 and HA-BTNL8 with soluble V $\gamma$ 4<sup>+</sup> TCR and anti-His monoclonal antibody (mAb). Data are from three independent experiments (mean  $\pm$  SD).

See also Figure S1.

In addition, analogous results were obtained when Jurkat 76 (J76) cells expressing a mouse V $\gamma$ 7 TCR were stimulated with MODE-K cells transduced with FLAG (N-terminal)-Btl1 and HA (N-terminal)-Btl6 constructs, in which case the anti-HA antibody more potently abrogated J76 activation (Figures 2A and 2B; Figure S2A). This was consistent with evidence that the responsiveness of V $\gamma$ 7<sup>+</sup> T cells to Btl1.6 was more potently abrogated by mutations in the V region of Btl6 compared with Btl1, suggestive of Btl6 being a direct ligand for V $\gamma$ 7 (Melandri et al., 2018). Indeed, soluble V $\gamma$ 7 TCR multimers specifically stained cells expressing Btl1.6 (293T.I116) (Figure 2C; Figure S2B) in a dose-dependent manner (Figure 2D; Figure S2C), consistent with direct TCR-Btl1.6 interactions.

Although our current and previous data suggested that multiple V $\delta$  chains are compatible with V $\gamma$ 4-mediated recognition of BTNL3.8, we could not exclude an effect of TCR $\delta$ . Compounding this, a recent study suggested that a certain V $\gamma$ 4 TCR was not able to mediate BTNL3.8-driven responses in a cellular assay and suggested that particularly long V $\delta$ 1 CDR3 sequences might explain this observation (Mayassi et al., 2019). To address this more fully, we investigated Jurkat cells transduced with V $\gamma$ 4 TCRs—either hu12- $\gamma$  containing the H-J1 motif identified in active celiac disease IELs (Mayassi et al., 2019) or hu20- $\gamma$ , a

V $\gamma$ 4 chain lacking the H-J1 motif (non-H-J1)—bearing a diverse range of V $\delta$ 1 chains (Melandri et al., 2018) (CDR3 ranged from 12 to 24 amino acids in length) for their capacity to upregulate CD69 and downregulate both TCR and CD3 in response to BTNL3.8-expressing cells. Conspicuously, all combinations resulted in similar degrees of  $\gamma\delta$  TCR and CD3 downregulation (Figure S2D). In addition, all constructs induced CD69 upregulation, although modest differences between different TCRs were observed, as we previously observed to be the case for TCR responses to anti-CD3 antibodies, as well as to BTNL- or Btl1-expressing cells (Melandri et al., 2018). These results establish that diverse V $\delta$ 1 CDR3 regions are permissive for V $\gamma$ 4-mediated TCR triggering in response to recognition of BTNL3.8 on target cells.

### Germline-Encoded Regions of V $\gamma$ 4 Dominate BTNL3 Interaction

We then assessed which regions of the V $\gamma$ 4 TCR chain were involved in directly engaging BTNL3. First, we generated V $\gamma$ 4 TCRs with charge reversal mutations in each of the three CDR $\gamma$  and CDR $\delta$  loops (Figure 3A). Second, based on amino acid sequence comparisons of V $\gamma$ 4 with V $\gamma$ 2 (which does not bind BTNL3), we generated V $\gamma$ 4 TCRs incorporating mutations in the HV4 $\gamma$  loop, which we previously implicated in

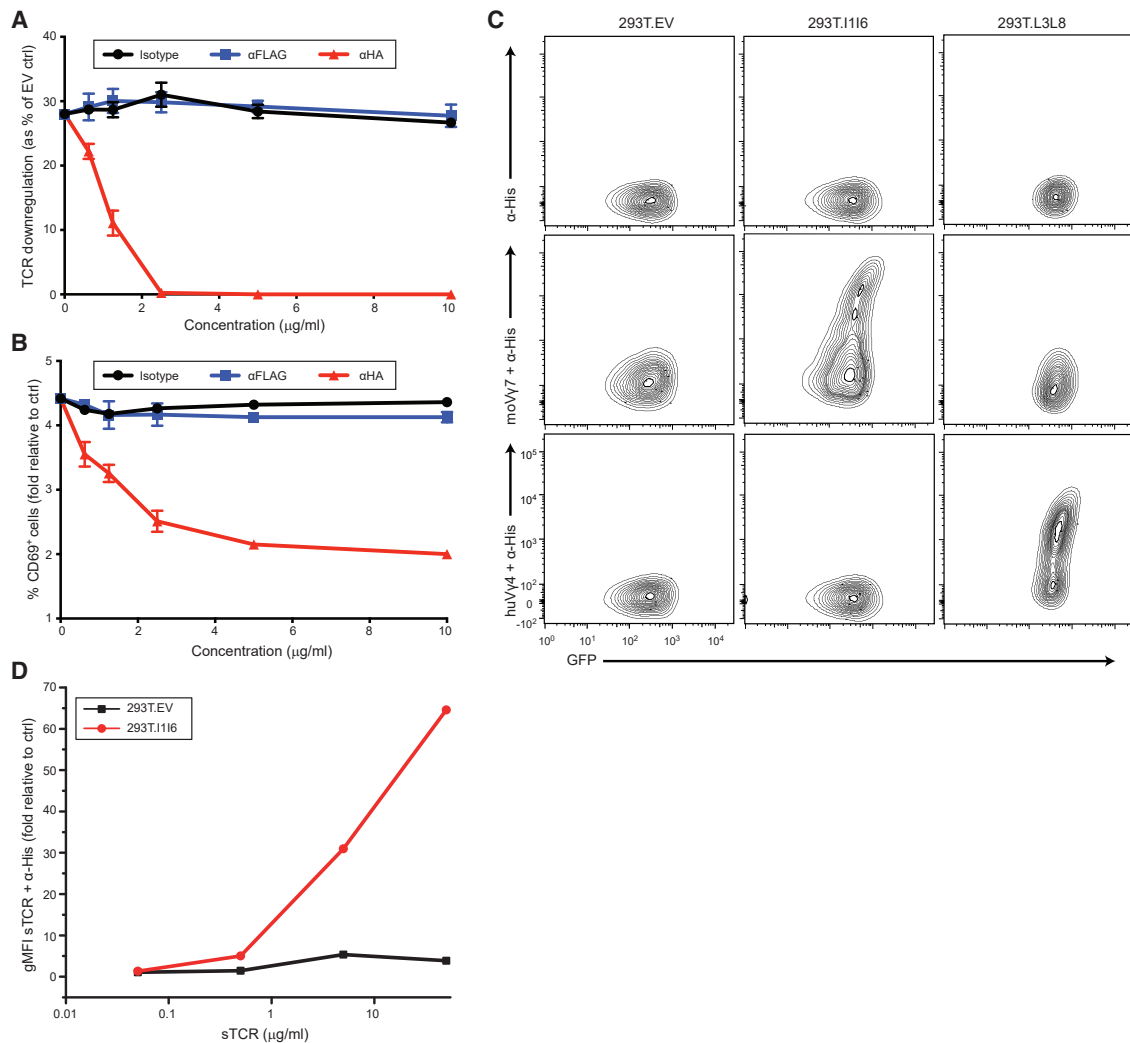

**Figure 2. Mouse V $\gamma$ 7 TCR-Dependent Recognition of Btln1.6**

(A and B) Flow cytometry analysis of TCR downregulation (A) and CD69 upregulation (B) by Jurkat 76 cells transduced with mo5 V $\gamma$ 7V $\delta$ 2-2 TCR and co-cultured for 5 h with MODE-K.FLAG-I1.HA-I6 cells in the presence of the indicated concentrations of antibodies (x axis). Results were normalized to those obtained by co-culture with transduced MODE-K.EV cells. Data are representative of three independent experiments (mean  $\pm$  SD of  $n = 3$  co-cultures).

(C) Specific staining of anti-His antibody alone (top row), soluble V $\gamma$ 7<sup>+</sup> TCR and anti-His mAb (middle row), or V $\gamma$ 4<sup>+</sup> TCR and anti-His mAb (bottom row) to 293T cells expressing Btln1.6, BTNL3.8, or control 293T.EV.

(D) Flow cytometry analysis of the staining of Btln1.6-expressing 293T cells with increasing concentrations of soluble V $\gamma$ 7<sup>+</sup> TCR and anti-His mAb. See also Figure S2.

BTNL3-mediated triggering of V $\gamma$ 4<sup>+</sup> T cells (Melandri et al., 2018). We chose the LES V $\gamma$ 4V $\delta$ 5 TCR as a model clonotype for these experiments, allowing comparison of the BTNL3 binding mode with that of endothelial protein C receptor (EPCR), which we previously identified as a unique ligand for the LES TCR (Willcox et al., 2012). BTNL3 binding affinity was substantially decreased by mutation of CDR2 $\gamma$  (Figure 3B; Figure S3A). Binding was even more strongly affected by substitution of V $\gamma$ 2 residues Y/A into the V $\gamma$ 4 HV4 loop (Figure 3B; Figure S3B), whereas substitution of N/L residues resulted in only marginally reduced affinity (Figure 3B). Consistent with this, LES TCR incorporating V $\gamma$ 2 residues Y/A in the V $\gamma$ 4 HV4 loop showed drastically reduced binding to BTNL3 by ITC (Figures S3C and S3D). Finally, compared with changes in the CDR2 $\gamma$  and HV4 $\gamma$  loops,

mutations in CDR1 $\gamma$ , CDR3 $\gamma$ , CDR1 $\delta$ , CDR2 $\delta$ , and CDR3 $\delta$  had either negligible or only modest effects on the interaction (Figure 3B). All soluble TCR (sTCR) mutants were folded correctly, as determined by pan- $\gamma$  $\delta$  TCR antibody binding (Figure S3E).

Based on these results, we hypothesized that the BTNL3-V $\gamma$ 4 interaction was heavily focused on the CDR2 and HV4 loop regions of V $\gamma$ 4. To test this, we generated chimeric constructs (Figure 3A) in which the CDR2 and/or HV4 loop regions of human V $\gamma$ 4 replaced the counterpart regions of V $\gamma$ 3 that are relatively divergent from V $\gamma$ 4, differing overall by 24 amino acids, and then tested the ability of Jurkat cells transduced with those TCRs to upregulate CD69 and downregulate TCR in response to BTNL3.8-expressing cells. In support of our hypothesis, transductants expressing a chimeric V $\gamma$ 3 construct that incorporated





V $\gamma$ 4 HV4 and CDR2 loops displayed degrees of CD69 upregulation and TCR downmodulation comparable to those of WT V $\gamma$ 4 TCR transductants, whereas replacement of the HV4 loop alone conferred only partial recovery of reactivity upon BTNL3.8 (Figure 3C; Figure S3F).

In parallel, we generated constructs of a mouse Btl1.6-reactive V $\gamma$ 7 TCR in which the CDR2 and HV4 loops were replaced with their counterparts from human BTNL3.8-reactive V $\gamma$ 4 (Figure 3A) and thereupon assessed the responsiveness of Jurkat transductants to mouse Btl1.6 and human BTNL3.8, respectively. Introduction of either HV4 or a combination of HV4 and CDR2 sequences from human V $\gamma$ 4 into the mouse V $\gamma$ 7 sequence abolished murine Btl1.6-mediated TCR downmodulation and CD69 upregulation yet concomitantly conferred reactivity to the human BTNL3.8 heterodimer (Figures 3D and 3E; Figure S3G). For TCR downmodulation, replacement of HV4 and CDR2 conferred  $\sim$ 90% of the BTNL3.8-induced TCR downmodulation observed with WT V $\gamma$ 4 TCR transductants, while HV4 replacement alone conferred a partial response. Of note, both the HV4 and the HV4 and CDR2 replacement constructs induced similar ( $>$ 3-fold) increases in CD69 expression over control in response to BTNL3.8-expressing target cells. Altogether, these results confirm that reactivity to human BTNL3.8 is encoded substantially within the germline-encoded HV4 and CDR2 regions of human V $\gamma$ 4 and that those regions alone were sufficient to convert a heterologous mouse TCR into one with almost full reactivity toward human BTNL3.8.

As a comparison for the BTNL3-TCR interaction, we tested how mutations in the CDR loops of the LES TCR (Figure 3A) affected EPCR binding. Mutation of LES CDR3 $\gamma$  or CDR3 $\delta$ , which minimally affected BTNL3 binding, eliminated LES binding to EPCR (Figure 3F; Figures S3H and S3I), consistent with the pronounced and highly focused expansion of the LES clonotype observed following cytomegalovirus (CMV) infection (Lafarge et al., 2005). By contrast, mutation of other CDR loops in the V $\gamma$ 4 or V $\delta$ 5 chains or of the HV4 region of V $\gamma$ 4 only modestly affected LES binding to EPCR (Figure 3F). Thus, BTNL3 and EPCR bound V $\gamma$ 4 via fundamentally distinct binding modes, raising the question of whether they could bind the LES TCR simultaneously. Arguing against this, however, co-incubation of the LES TCR with BTNL3 IgV decreased its EPCR binding in a concentration-dependent manner (to  $<$ 40%). This inhibition was specific, as judged by the failure of co-incubation with BTNL8 IgV to affect EPCR binding (Figure 3G).

### V $\gamma$ 4 TCR Interaction Involves the CFG Face of the BTNL3 IgV Domain

To assess the regions of the BTNL3 IgV domain involved in binding, we used SPR to test the interaction with V $\gamma$ 4 TCR of four BTNL3 IgV domain mutants that incorporated changes in the C', C'' F, and G  $\beta$  strands of the BTNL3 IgV domain (CFG face), as was recently considered (Melandri et al., 2018) (Figure 4A). Upon injection, the BTNL3<sup>GQFSS</sup>, BTNL3<sup>RI</sup>, and BTNL3<sup>YQKAI</sup> mutants each exhibited minimal specific binding to V $\gamma$ 4 TCR, with a substantially reduced affinity relative to WT BTNL3 IgV, whereas the BTNL3<sup>KDQPFM</sup> mutant clearly retained V $\gamma$ 4 binding (Figures 4B–4E; Figures S4A–S4D). Moreover, relative to WT BTNL3, the BTNL3<sup>RI</sup> mutant showed reduced binding affinity to V $\gamma$ 4 TCR in ITC ( $K_d = \sim$ 50 versus 3.5  $\mu$ M for WT BTNL3) (Figures S4E and S4F). All BTNL3 mutants bound polyclonal anti-BTNL3 antibody (Figures S4G and S4H), suggesting that mutations in the CFG face did not inhibit expression or refolding of BTNL3 IgV. In parallel, we expressed the corresponding mutations as BTNL3.8 heterodimers in 293T cells and tested sTCR staining at the cell surface. Consistent with the SPR results, cells expressing BTNL3<sup>GQFSS</sup>.8, BTNL3<sup>RI</sup>.8, and BTNL3<sup>YQKAI</sup>.8 were not bound by sTCR, whereas the BTNL3<sup>KDQPFM</sup>.L8 mutant retained TCR staining, albeit reduced compared with WT BTNL3.8 (Figure 4F). Altogether, these experiments clearly implicate residues in the CFG face of BTNL3 in direct binding to the V $\gamma$ 4 TCR chain. In addition, V $\gamma$ 7 sTCR multimer staining to cells expressing Btl1.6 was abolished by mutations of the counterpart positions of Btl1.6 IgV (Melandri et al., 2018) (Figure S4I). Thus, a comparable mode of interaction is seemingly conserved from mouse through to human.

Although we did not directly address the role of the IgC domains of BTNL3 or BTNL8 in V $\gamma$ 4 TCR recognition, homology modeling of the heterodimer based on the BTN3A1 homodimer (PDB: 4F80) confirmed a strong potential for BTNL3 IgC-BTNL8 IgC interchain heterodimer interactions (Figure S4J). Conversely, the formation of BTNL3.8 heterodimers analogous to non-symmetrical head-to-tail heterodimer interfaces observed in the crystal structure of BTN3A1, BTN3A2, and BTN3A3 (PDB: 4F80, 4F8Q, 4F8T) seems unlikely given comparisons of equivalent amino acids in BTNL3 IgV and BTNL8 IgC and in BTNL3 IgC and BTNL8 IgV (Figure S4K). These analyses suggest the BTNL3.8 heterodimer likely adopts a V-shaped dimer configuration similar to that observed in the BTN3A1 crystal lattice (Palakodeti et al., 2012), with the V region of one chain, BTNL3, available for direct binding to the CDR2-HV4 face of V $\gamma$ 4.

(C) Flow cytometry analysis of TCR downregulation (x axis) plotted against that of CD69 upregulation (y axis) on JRT3 cells transduced with wild-type (WT) V $\gamma$ 4V $\delta$ 1 TCR or the indicated V $\gamma$ 3 or V $\gamma$ 4 TCR hybrids and co-cultured for 4 h with 293T.L3L8 cells. Results were normalized to those obtained by co-culture with 293T.EV cells. Data are representative of two independent experiments (mean  $\pm$  SD of  $n = 3$  co-cultures).

(D and E) Flow cytometry analysis of TCR downregulation (D) and CD69 upregulation (E) on J76 cells transduced with mo5 (V $\gamma$ 7V $\delta$ 2-2) TCR or the indicated moV $\gamma$ 7/huV $\gamma$ 4 hybrid TCRs after co-culture with 293T.L116 or 293T.L3L8 cells. Results were normalized to those obtained by co-culture with 293T.EV cells. Data are representative of three independent experiments (mean  $\pm$  SD of  $n = 3$  co-cultures).

(F) Binding affinity of EPCR to V $\gamma$ 4 and V $\delta$ 5 mutants (mutant  $K_d$ ) relative to WT LES TCR affinity (WT  $K_d$ ) measured in the same experiment, representative of 2–3 experiments.

(G) EPCR (3,012 RU) or control protein (2,586 RU) were immobilized on the sensor chip. WT LES TCR was injected over the surface at 12.5  $\mu$ M in the presence of increasing specific competitor (BTNL3 IgV) or non-specific competitor (BTNL8 IgV). Binding responses were measured and are shown as a percentage of binding observed in the absence of competitor.

See also Figure S3.





### Parallels between BTNL3 Recognition and BTN3A1-Mediated P-Ag Sensing

To investigate whether the mode of ligand interaction employed by V $\gamma$ 4 TCRs might have relevance for V $\gamma$ 9-mediated P-Ag sensing, which is highly dependent upon the presence of BTN3A1 on target cells, we used a hypothetical model (Melandri et al., 2018) of the V $\gamma$ 4 TCR-BTNL3 interaction we had previously generated with the computational docking program SwarmDock to deduce three pairs of amino acids likely to contribute directly to the interaction between V $\gamma$ 4 and BTNL3. V $\gamma$ 4-HV4 D, Y, and R were predicted to contact BTNL3 H, W, and E, respectively (Figure 5A). We then identified counterpart amino acids in V $\gamma$ 9-HV4 (E, D, and H) by aligning with V $\gamma$ 4-HV4 (Figure 5B; Figure S5A) and counterpart amino acids in BTN3A1-IgV (R, Y, and K) by aligning with BTNL3-IgV (Figure 5C; Figure S5B).

Next, we generated two HV4 $\gamma$  mutants, V $\gamma$ 9<sup>ED</sup> > <sup>KL</sup>V $\delta$ 2 and V $\gamma$ 9<sup>H</sup> > <sup>R</sup>V $\delta$ 2, which were designed to introduce charge alterations that might interfere with a putative analogous TCR-ligand interaction. Both mutants displayed efficient cell surface expression in JRT3 cells, equivalent to the WT TCR from which they were derived (Figure 5D), but abrogated CD69 upregulation in response to zoledronate (Zol)-treated 293T cells (Figure 5E; Figure S5C). Hence, P-Ag sensing by the V $\gamma$ 9V $\delta$ 2 TCR was critically affected by specific HV4 $\gamma$  residues in counterpart positions to the V $\gamma$ 4 residues that mediate BTNL3 interactions.

We then tested whether P-Ag sensing might likewise be affected by mutation of residues in the CFG face of the BTN3A1 IgV domain (SSLRQ, YF, and YEKAL) corresponding to those (NQFHA, WF, and DEEAT) implicated in the BTNL3 interaction with V $\gamma$ 4 HV4 (Melandri et al., 2018, and as described earlier). Thus, we introduced non-conservative mutations of a single amino acid in each BTN3A1 motif (SSLRQ > SSLEQ, YF > DF, and YEKAL > YEMAL). When expressed in BTN3<sup>-/-</sup> CRA123 cells (Vantourout et al., 2018), the 3A1<sup>SSLEQ</sup> and 3A1<sup>YEMAL</sup> mutants each displayed cell surface expression similar to that of WT BTN3A1 (Figure S5D), but compared with WT, they both failed to support the potential of Zol-treated CRA123 cells to stimulate two polyclonal V $\gamma$ 9V $\delta$ 2 T cell lines (Figure 5F; Figure S5E). These findings clearly implicated the CFG face of BTN3A1-IgV in the activation of P-Ag-reactive V $\gamma$ 9V $\delta$ 2 T cells, akin to the involvement of the counterpart regions of BTNL3 in provoking human V $\gamma$ 4 responses (as described earlier). Note that although the 3A1<sup>DF</sup> mutant also failed to support the potential of Zol-treated CRA123 cells to stimulate V $\gamma$ 9V $\delta$ 2 cells, it could not be excluded that this was because this construct reached the cell surface inefficiently (Figure 5F; Figure S5D), thereby implicating the YF motif in the stringent regulation of BTN3A1 cell surface expression, as was previously considered (Vantourout et al., 2018).

Although BTN3A1 can be sufficient to support P-Ag stimulation of V $\gamma$ 9V $\delta$ 2 T cells, this is greatly increased by co-expression of BTN3A2, which regulates the trafficking and cell surface expression of BTN3A1 via heteromerization (Vantourout et al., 2018). We therefore investigated whether the CFG face mutations of BTN3A1 could be complemented by WT BTN3A2, and vice versa. Thus, we generated the same CFG motif mutants of BTN3A2 and tested the expression of each combination (i.e., 3A1<sup>mutant</sup> + 3A2<sup>wt</sup>, 3A1<sup>wt</sup> + 3A2<sup>mutant</sup>, and 3A1<sup>mutant</sup> + 3A2<sup>mutant</sup>) in CRA123 cells. Again, the SSLEQ and YEMAL mutants dis-

played cell surface expression similar to WT BTN3A1+BTN3A2, while the DF mutants showed decreased expression, particularly when both BTN3A1 and BTN3A2 carried this mutation (Figure S5F). However, when co-expressed with BTN3A2, the CFG face mutations in BTN3A1 negligibly affected Zol-induced CD107a upregulation by polyclonal V $\gamma$ 9V $\delta$ 2 T cells (Figure 5G). By contrast, CFG face mutations in BTN3A2 could not be rescued by co-expression of WT BTN3A1, impairing CD69 upregulation almost as much as when BTN3A1 and BTN3A2 were both mutated in the CFG faces (Figure 5G; Figure S5G). Moreover, similar impacts were observed when the responders were JRT3 cells expressing a WT V $\gamma$ 9V $\delta$ 2 TCR (Figures S5H and S5I). Altogether, these data show that three systems of BTN-mediated  $\gamma\delta$  T cell regulation—human V $\gamma$ 4 and BTNL3.8, murine V $\gamma$ 7 and Btl1.6, and human V $\gamma$ 9 and BTN3A—receive critical contributions from HV4 of the relevant TCR V $\gamma$  chain and from specific, orthologous IgV-CFG face residues of the relevant BTNs.

### DISCUSSION

Over the past decade, it has become clear that BTN and BTNL/Btl members of the B7 superfamily play critical roles in  $\gamma\delta$  T cell selection and activation in mice and humans, spanning both peripheral blood and tissue-associated subsets (Barbee et al., 2011; Boyden et al., 2008; Di Marco Barros et al., 2016; Harly et al., 2012; Turchinovich and Hayday, 2011). Nonetheless, although several studies have shed light on the mechanism(s) underpinning this profound biology, key aspects have remained largely unresolved, in particular whether there are direct interactions of the relevant TCRs with BTN, BTNL, or Btl proteins. Addressing this, the current study provides unequivocal evidence that the human BTNL3.8 heterodimer interacts directly with V $\gamma$ 4  $\gamma\delta$  TCRs, specifically via the BTNL3 chain. This builds on previous work demonstrating that cells expressing BTNL3.8 complexes could induce TCR-mediated stimulation of human V $\gamma$ 4 gut T cells, while the counterpart murine molecules, Btl1.6, induced TCR triggering of mouse gut V $\gamma$ 7 T cells (Di Marco Barros et al., 2016; Melandri et al., 2018).

Previously, the only evidence of BTN or BTNL directly engaging the TCR was provided by Vavassori et al. (2013), who reported direct binding of a V $\gamma$ 9V $\delta$ 2 TCR to the BTN3A1 ectodomain, which was also reported to present P-Ag. However, both findings have been convincingly challenged (Sandstrom et al., 2014), and our laboratory has similarly failed to reproduce V $\gamma$ 9V $\delta$ 2 TCR-BTN3A1 binding. In contrast to this, the current study, which incorporates evidence from a combination of SPR, ITC, and mutagenesis, not only documents direct binding of the BTNL3 IgV domain to V $\gamma$ 4 but also demonstrates an interaction modality resembling that of superantigens (Sundberg et al., 2007) in its complete dependence on germline-encoded V $\gamma$ 4 HV4 and its substantial reliance on germline-encoded V $\gamma$ 4 CDR2.

Although our study focused predominantly on the LES clone-type as a model V $\gamma$ 4 TCR, the binding modality we outline fully explains both the specificity of BTNL3 binding to V $\gamma$ 4 TCRs, but not to V $\gamma$ 2 or V $\gamma$ 3 TCRs, and our previous findings that BTNL3.8 dimers trigger TCR downregulation of essentially any TCRs that are V $\gamma$ 4<sup>+</sup>, irrespective of CDR3 $\gamma$  or TCR V $\delta$

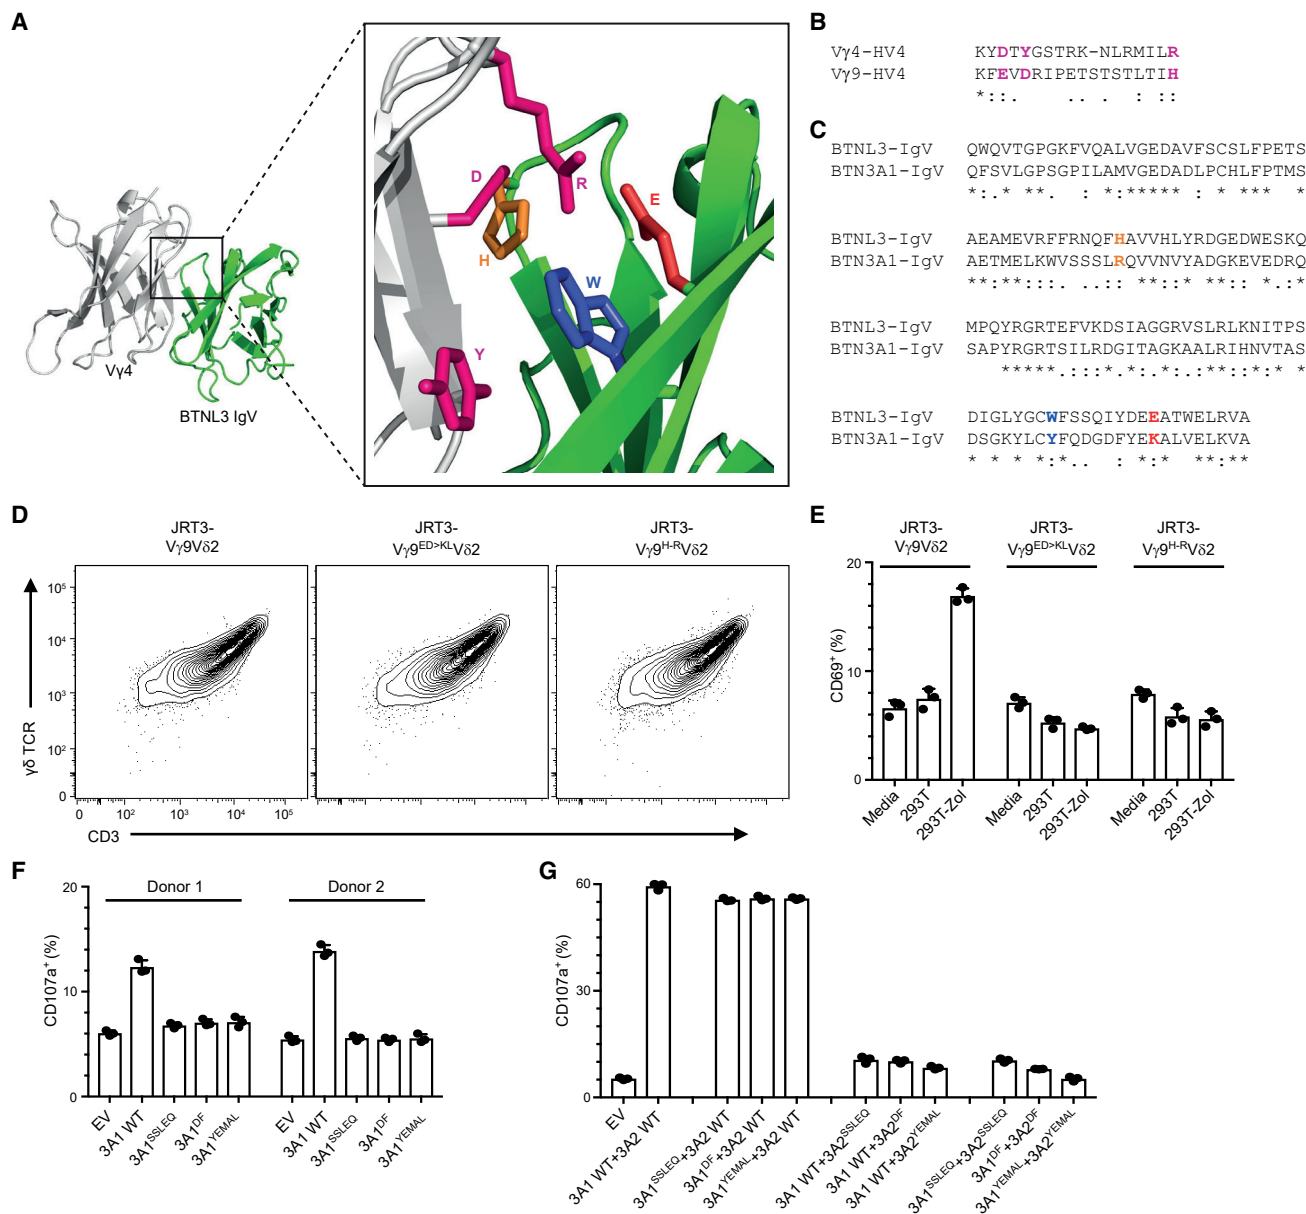

**Figure 5. The HV4 Region of the V $\gamma$ 9 TCR and the CFG Face of BTNL3A1 and BTNL3A2 Are Involved in the Phosphoantigen-Induced Activation of V $\gamma$ 9V $\delta$ 2 T Cells**

(A) Best fit hypothetical model for docking of the V $\gamma$ 4 TCR V domain (light gray) onto the BTNL3 IgV domain (green) (Melandri et al., 2018), generated using the computational docking program SwarmDock. Side chains are displayed for amino acids potentially directly involved in the contact between the V $\gamma$ 4 HV4 region (D, Y, and R; pink) and the CFG face of the BTNL3-IgV domain (H61, W115, and E124; orange, blue, and red, respectively).

(B and C) Alignment of the HV4 region of the V $\gamma$ 4 and V $\gamma$ 9 TCR V domains (B) and the IgV domains of BTNL3 and BTNL3A1 and BTNL3A2 (C). Amino acids of interest are colored as in (A).

(D) Flow cytometry analysis of the expression of the indicated V $\gamma$ 9V $\delta$ 2 TCR variants by JRT3 cells, 72 h post-transduction.

(E) Flow cytometry analysis of CD69 upregulation by JRT3 cells expressing the indicated V $\gamma$ 9V $\delta$ 2 TCR variants, following incubation with media only, or 293T cells with or without pre-treatment with zoledronate (Zol, 10  $\mu$ M). Data are representative of three experiments (mean  $\pm$  SD of  $n = 3$  co-cultures).

(F) Flow cytometry analysis of CD107a upregulation by polyclonal V $\gamma$ 9V $\delta$ 2 T cell lines derived from peripheral blood mononuclear cells from two donors following co-culture with CRA123 cells transfected with the indicated BTNL3A1 constructs (EV, empty vector control) and pre-treated with 10  $\mu$ M Zol. Data are the mean  $\pm$  SD of  $n = 3$  co-cultures for each donor.

(G) Flow cytometry analysis of CD107a upregulation by a polyclonal V $\gamma$ 9V $\delta$ 2 T cell line following co-culture with CRA123 cells co-transfected with the indicated BTNL3A1 + BTNL3A2 constructs (EV, empty vector control) and pre-treated with 10  $\mu$ M Zol. Data are the mean  $\pm$  SD of  $n = 3$  co-cultures.

See also Figure S5.

usage (Melandri et al., 2018). In this respect, it is challenging to understand the claim that a  $V\gamma 4^+$  TCR identified in a celiac disease gut failed to respond to BTNL3-expressing cells (Mayassi et al., 2019). Indeed, by using a cellular assay of TCR and CD3 downregulation, we show here that manipulating the length and sequence of the  $V\delta 1$ -CDR3 region had negligible, if any, effects on the efficiency of BTNL3.8 recognition, even when long CDR3 regions were incorporated. Despite this, some modest differences in CD69 upregulation were observed. The failure of Mayassi et al. (2019) to detect a BTNL3-mediated response of a particular  $V\gamma 4^+$  TCR might reflect their use of a less sensitive assay system. This notwithstanding, we cannot formally exclude that rare CDR3 $\delta$  regions might indirectly affect the interaction, for example, via effects on CDR2 loop conformation. Indeed, we note that different TCRs can transduce quantitatively different signals in response to anti-CD3 agonist antibodies (Melandri et al., 2018), which must also reflect indirect effects.

Considering that BTNL3.8 and Btl1.6 heteromers are expressed specifically by intestinal epithelial cells of humans and mice, respectively, extrapolation of the findings presented here to Btl6-mediated interactions with  $V\gamma 7$  would readily explain how BTNL/Btl proteins can act as tissue-specific, non-clonal selecting elements for signature  $\gamma\delta$  T cell compartments defined by discrete  $V\gamma$  chains. Our demonstration in the current study that mouse  $V\gamma 7$  multimers specifically stain Btl1.6-expressing target cells, combined with mutagenesis studies, is consistent with the evolutionary conservation of the mode of action to BTNL3.8.

By focusing on the LES  $V\gamma 4$  TCR that we have previously shown to recognize EPCR (Willcox et al., 2012), we were able to compare TCR recognition of BTNL3 with that of a clonally restricted antigenic ligand. The private LES clonotype expanded substantially in an individual after CMV infection, adopted an effector phenotype (Lafarge et al., 2005), and appeared to align closely with the adaptive biology that has recently emerged for some human  $\gamma\delta$  T cell subsets, including  $V\delta 2^{\text{neg}}$  and  $V\gamma 9^{\text{neg}}V\delta 2^+$  T cells, which can both demonstrate highly focused clonotypic expansion and differentiation after antigenic challenge (Davey et al., 2018a). Our study provides unequivocal data that BTNL3 engages the TCR by a qualitatively different modality to that by which clonally restricted ligands engage the TCR. Whereas the former (BTNL3) modality focused predominantly on germline-encoded regions (the HV4 and CDR2 regions were sufficient to confer essentially complete BTNL3.8 recognition upon human  $V\gamma 3$  and upon a heterologous mouse  $V\gamma 7$  TCR), the latter (EPCR) modality was energetically focused on CDR3 $\gamma$  and CDR3 $\delta$  regions that are generated by somatic gene rearrangement. Although this latter CDR3 mode might be expected to incur substantial entropic penalties upon binding, as for both CDR3-driven antibody-antigen and  $\alpha\beta$  TCR-peptide-major histocompatibility complex (MHC) binding (Stites, 1997; Willcox et al., 1999), a notable feature of  $V\gamma 4^+$  TCR-BTNL3 interaction evident from our ITC data was a relatively modest change in entropy, suggestive of a more rigid body interaction mode. This is consistent with our hypothetical model of  $V\gamma 4^+$  TCR-BTNL3 interaction (Melandri et al., 2018), whereby the HV4 and CDR2 elements involved in the  $V\gamma 4^+$  TCR derive from  $\beta$  sheet structure, which might remain relatively rigid even in the unbound state.

Future studies will be needed to understand whether this is a common feature of TCR-BTN, TCR-BTNL, and mouse TCR-Btl protein interactions.

The full scope of these two ligand interaction modalities is currently unclear. Possibly, one modality is exclusive of the other; consistent with this, our results indicate the LES TCR is unable to engage both BTNL3 and EPCR synchronously. This argues strongly against any universal requirement for co-engagement of BTNL3 and antigenic ligands in TCR-mediated stimulation of  $V\gamma 4^+$  T cells. Consistent with this, in some donors, clonally expanded  $V\gamma 4V\delta 1^+$  and  $V\gamma 4V\delta 2^+$  adaptive-like populations can be identified in both peripheral blood and liver where BTNL3.8 is not expressed (Davey et al., 2017; Hunter et al., 2018; Di Marco Barros et al., 2016). However, it remains possible that there is sequential use of the two modalities: thus, selection and/or tonic engagement of BTNL3.8 may be an essential preface to clonotypic antigen engagement within the  $V\gamma 4^+$  T cell compartment in response to various forms of tissue dysregulation.

Alternatively, it cannot be discounted that one  $\gamma\delta$  T cell might only ever respond via one of the two modalities. By this means,  $\gamma\delta$  T cells would collectively provide complementary, innate-like, and adaptive arms to the  $\gamma\delta$  T cell response. Studies on adaptive  $\gamma\delta$  T cells have highlighted their potential, following antigenic challenge, to populate tissues with clonally expanded subsets that have heightened effector capability and are likely to provide ongoing immune surveillance against recurrently encountered challenges (Hunter et al., 2018). However, such responses are likely to be highly dependent upon exposure to specific immunological scenarios such as pathogen infection, including CMV (Davey et al., 2017, 2018b; Ravens et al., 2017), or possibly antigenic changes underlying autoimmune or inflammatory conditions.

In contrast, the constitutive, selective tissue associations of BTNL/Btl molecules have the potential to pre-populate relevant tissues with functionally distinct innate-like  $\gamma\delta$  T cells (Boyden et al., 2008; Di Marco Barros et al., 2016; Turchinovich and Hayward, 2011). Given that the respective TCR binding modalities we observe might permit  $\gamma\delta$  T cells collectively to make either innate-like or adaptive responses, it will be important to study whether the two modalities induce distinct TCR-mediated signaling pathways, as seems to be the case for  $\alpha\beta$  TCR-activating superantigens that engage HV4 regions of TCR  $V\beta$  versus peptide-MHC engagement that depends on the CDR3 regions (Bueno et al., 2006). Studies on intraepithelial  $\gamma\delta$  T cell populations have suggested that these cells can make growth factors such as keratinocyte growth factor, insulin-like growth factor, and amphiregulin, consistent with roles in epithelial homeostasis (Boismenu and Havran, 1994; Krishnan et al., 2018; Mayassi et al., 2019; Shires et al., 2001). Conceivably, engagement of BTNL/Btl family members (or related Skint molecules in the skin) might stimulate the cells' production of growth factors involved in tissue repair and homeostasis, while engagement of clonally restricted antigen might induce different functional outcomes, such as the production of interferon (IFN)  $\gamma$ , or interleukin-13 (IL-13) (Dalessandri et al., 2016). In this regard, the celiac gut was reported to harbor an enrichment of more adaptive, clonally expanded  $V\gamma 4^+$   $\gamma\delta$  T cells, which were hypothesized to contribute to inflammation (Mayassi et al., 2019).

Future studies should explore the generality of bimodal antigen receptor binding. Several sets of data, including some presented here, strongly argue that this will be conserved for murine intestinal intraepithelial V $\gamma$ 7 cells, which are strictly regulated by Btl1.6 heteromer but may display CDR3-mediated clonal or oligoclonal responses to other antigens, including T10 and T22 (Shin et al., 2005). In particular, our observation that V $\gamma$ 7 TCR-Btl1.6 recognition is abolished either by substituting mouse V $\gamma$ 7 CDR2 and HV4 regions with those of human V $\gamma$ 4 or by mutating Btl1.6 residues at positions equivalent to BTNL3 residues implicated in V $\gamma$ 4 TCR binding strongly suggests a V $\gamma$ 7-Btl1.6 recognition mode analogous to V $\gamma$ 4-BTNL3.

Likewise, although BTN3A1-dependent P-Ag responses of human peripheral blood V $\gamma$ 9V $\delta$ 2 cells are irrefutably associated with specific TCR $\gamma$  junction (J $\gamma$ ) region sequences (Bukowski et al., 1998; Delfau et al., 1992), in the manner of adaptive reactivities, the rapid and universal response of V $\gamma$ 9V $\delta$ 2 cells to P-Ags (Davey et al., 2018b; Morita et al., 1995) appears to be innate-like. Despite the highly distinct biology of V $\gamma$ 9V $\delta$ 2 lymphocytes relative to intestinal V $\gamma$ 4<sup>+</sup> and V $\gamma$ 7<sup>+</sup> T cells, it is striking that their BTN3A-dependent response to P-Ags was eliminated by V $\gamma$ 9 HV4 mutations in counterpart positions to V $\gamma$ 4 HV4 mutations that abrogate BTNL3 binding and that BTN3A-CFG mutations analogous to BTNL3 regions involved in binding V $\gamma$ 4 severely diminished P-Ag sensing. In addition, the strong impact of mutations in BTN3A2 relative to BTN3A1 was highly intriguing, particularly given their identical IgV domain sequence. Clearly, additional work is needed to clarify the precise molecular targets recognized by the V $\gamma$ 9V $\delta$ 2 TCR and the modalities by which they are engaged. Data presented here further implicate the V region of BTN3A2 in V $\gamma$ 9V $\delta$ 2 T cell responses, which likewise merits follow-up. Importantly, in light of the failure to detect direct binding of V $\gamma$ 9V $\delta$ 2 TCR to BTN3A1, our mutational data might imply that BTN3A1 or BTN3A2 does indeed interact with the V $\gamma$ 9V $\delta$ 2 TCR but either does so weakly and/or in concert with additional moieties, candidates for which might include the F<sub>1</sub>-ATPase (Scotet et al., 2005). Supporting the feasibility of this suggestion, a recent crystallographic study of pollen allergen-antibody recognition highlighted simultaneous interaction of each Fab fragment with two separate ligand surfaces: one via a superantigen-like modality involving germline-encoded receptor regions and the other involving a more conventional CDR3-mediated interaction (Mitropoulou et al., 2018).

In the most extreme generality, the existence of distinct, parallel ligand recognition modes might be a feature of many antigen receptors. Thus, there are  $\alpha\beta$  TCRs that can engage endogenous or exogenous superantigens via germline-encoded subdomains and peptide-MHC complexes largely via recombination-dependent CDR3 subregions (Sundberg et al., 2007). Moreover, there is increasing interest in antibodies that disproportionately employ HV4 in antigen binding (Meyer et al., 2016). In this regard, our present and prior studies argue strongly that the  $\gamma\delta$  TCR retains the potential for bimodal ligand recognition. Moreover, this appears to be an evolutionarily conserved trait, at least from mice to humans, with many properties of mouse V $\gamma$ 7 being shared with human V $\gamma$ 4. Given that distinct tissue associations based on V $\gamma$  region usage are a signature of several  $\gamma\delta$  T cell populations in mice, it may be that other B7-like ligands operate at defined anatomical sites to engage the HV4 and CDR2 regions

of the relevant murine TCR V $\gamma$  regions, thereby regulating unique, tissue-specific subsets of  $\gamma\delta$  T cells. In this regard, the emerging alignment between mouse and human  $\gamma\delta$  T cell biology in TCR-mediated recognition of BTNL molecules fuels optimism that further studies on mouse  $\gamma\delta$  TCR ligands may greatly inform human  $\gamma\delta$  T cell biology and its relationship to myriad pathophysiologicals. Furthermore, given that HV4 and CDR2 are germline-encoded, their interactions with ligands may have contributed to the inheritance patterns of particular V gene segments across Ig,  $\alpha\beta$  TCRs, and  $\gamma\delta$  TCRs.

## STAR★METHODS

Detailed methods are provided in the online version of this paper and include the following:

- KEY RESOURCES TABLE
- LEAD CONTACT AND MATERIALS AVAILABILITY
- METHOD DETAILS
  - Soluble Protein Production
  - Surface Plasmon Resonance
  - Isothermal Titration Calorimetry
  - Cell Lines
  - Reagents
  - Mutagenesis and Molecular Biology
  - Lentiviral Transduction
  - Co-culture Assay
  - Flow Cytometry
  - Software
  - Molecular Modeling
- QUANTIFICATION AND STATISTICAL ANALYSIS
- DATA AND CODE AVAILABILITY

## SUPPLEMENTAL INFORMATION

Supplemental Information can be found online at <https://doi.org/10.1016/j.immuni.2019.09.006>.

## ACKNOWLEDGMENTS

We thank the University of Birmingham Protein Expression Facility for use of their equipment, P. Bates and R. Chaleil (the Francis Crick Institute) for advice, and O. Polyakova and O. Nussbaumer (GammaDelta Therapeutics) for V $\gamma$ 4V $\delta$ 1 sTCR reagents. This work was supported in part by the Wellcome Trust (grant 208400/Z/17/Z to University of Birmingham), and we thank HWB-NMR staff at the University of Birmingham for providing open access to their Wellcome Trust-funded 800/900 MHz spectrometers. This work was supported by the Wellcome Trust (grant 099266/Z/12/Z to B.E.W. supporting C.R.W., M.S., and F.M.); a Wellcome Trust Investigator Award (grant 106292/Z/14/Z to A.C.H.); the Francis Crick Institute, which receives its core funding from Cancer Research UK (CRUK) (grant FC001093), the UK Medical Research Council (grant FC001093), and the Wellcome Trust (grant FC001093); studentships from King's Bioscience Institute and Guy's and St Thomas' Charity Prize PhD program in Biomedical and Translational Science (to D.M.); and the National Institute for Health Research (NIHR) Biomedical Research Centre at Guy's and St Thomas' NHS Foundation Trust and King's College London (to I.Z.).

## AUTHOR CONTRIBUTIONS

Conceptualization, A.C.H. and B.E.W.; Investigation, C.R.W., P.V., M.S., I.Z., D.M., L.Z., R.G., S.K, F.M., and M.J.; Writing – Original Draft, B.E.W. and A.C.H.; Writing – Review & Editing, C.R.W., P.V., D.M., I.Z., F.M., A.C.H.,



and B.E.W.; Visualization, C.R.W., P.V., I.Z., D.M., M.J., and F.M.; Funding Acquisition, A.C.H. and B.E.W.; Supervision, A.C.H. and B.E.W.

## DECLARATION OF INTERESTS

A.C.H. is a board member and equity holder in GammaDelta Therapeutics and in ImmunoQure AG.

Received: April 7, 2019

Revised: July 12, 2019

Accepted: September 9, 2019

Published: October 15, 2019

## REFERENCES

- Abeler-Dörner, L., Swamy, M., Williams, G., Hayday, A.C., and Bas, A. (2012). Butyrophilins: an emerging family of immune regulators. *Trends Immunol.* **33**, 34–41.
- Asarnow, D.M., Kuziel, W.A., Bonyhadi, M., Tigelaar, R.E., Tucker, P.W., and Allison, J.P. (1988). Limited diversity of gamma delta antigen receptor genes of Thy-1+ dendritic epidermal cells. *Cell* **55**, 837–847.
- Barbee, S.D., Woodward, M.J., Turchinovich, G., Mention, J.J., Lewis, J.M., Boyden, L.M., Lifton, R.P., Tigelaar, R., and Hayday, A.C. (2011). Skint-1 is a highly specific, unique selecting component for epidermal T cells. *Proc. Natl. Acad. Sci. USA* **108**, 3330–3335.
- Boismenu, R., and Havran, W.L. (1994). Modulation of epithelial cell growth by intraepithelial gamma delta T cells. *Science* **266**, 1253–1255.
- Boyden, L.M., Lewis, J.M., Barbee, S.D., Bas, A., Girardi, M., Hayday, A.C., Tigelaar, R.E., and Lifton, R.P. (2008). Skint1, the prototype of a newly identified immunoglobulin superfamily gene cluster, positively selects epidermal gammadelta T cells. *Nat. Genet.* **40**, 656–662.
- Bueno, C., Lemke, C.D., Criado, G., Baroja, M.L., Ferguson, S.S., Rahman, A.K., Tsoukas, C.D., McCormick, J.K., and Madrenas, J. (2006). Bacterial superantigens bypass Lck-dependent T cell receptor signaling by activating a Galpha11-dependent, PLC-beta-mediated pathway. *Immunity* **25**, 67–78.
- Bukowski, J.F., Morita, C.T., Band, H., and Brenner, M.B. (1998). Crucial role of TCR gamma chain junctional region in prenyl pyrophosphate antigen recognition by gamma delta T cells. *J. Immunol.* **161**, 286–293.
- Dalessandri, T., Crawford, G., Hayes, M., Castro Seoane, R., and Strid, J. (2016). IL-13 from intraepithelial lymphocytes regulates tissue homeostasis and protects against carcinogenesis in the skin. *Nat. Commun.* **7**, 12080.
- Davey, M.S., Willcox, C.R., Joyce, S.P., Ladell, K., Kasatskaya, S.A., McLaren, J.E., Hunter, S., Salim, M., Mohammed, F., Price, D.A., et al. (2017). Clonal selection in the human Vδ1 T cell repertoire indicates γδ TCR-dependent adaptive immune surveillance. *Nat. Commun.* **8**, 14760.
- Davey, M.S., Willcox, C.R., Baker, A.T., Hunter, S., and Willcox, B.E. (2018a). Recasting Human Vδ1 Lymphocytes in an Adaptive Role. *Trends Immunol.* **39**, 446–459.
- Davey, M.S., Willcox, C.R., Hunter, S., Kasatskaya, S.A., Remmerswaal, E.B.M., Salim, M., Mohammed, F., Bemelman, F.J., Chudakov, D.M., Oo, Y.H., and Willcox, B.E. (2018b). The human Vδ2+ T-cell compartment comprises distinct innate-like Vγ9+ and adaptive Vγ9- subsets. *Nat. Commun.* **9**, 1760.
- Delfau, M.H., Hance, A.J., Lecossier, D., Vilmer, E., and Grandchamp, B. (1992). Restricted diversity of V gamma 9-JP rearrangements in unstimulated human gamma/delta T lymphocytes. *Eur. J. Immunol.* **22**, 2437–2443.
- Di Marco Barros, R., Roberts, N.A., Dart, R.J., Vantourout, P., Jandke, A., Nussbaumer, O., Deban, L., Cipolat, S., Hart, R., Iannitto, M.L., et al. (2016). Epithelia Use Butyrophilin-like Molecules to Shape Organ-Specific γδ T Cell Compartments. *Cell* **167**, 203–218.e17.
- Edelblum, K.L., Singh, G., Odenwald, M.A., Lingaraju, A., El Bissati, K., McLeod, R., Sperling, A.I., and Turner, J.R. (2015). γδ Intraepithelial Lymphocyte Migration Limits Transepithelial Pathogen Invasion and Systemic Disease in Mice. *Gastroenterology* **148**, 1417–1426.
- Fouchier, R.A., Meyer, B.E., Simon, J.H., Fischer, U., and Malim, M.H. (1997). HIV-1 infection of non-dividing cells: evidence that the amino-terminal basic region of the viral matrix protein is important for Gag processing but not for post-entry nuclear import. *EMBO J.* **16**, 4531–4539.
- Girardi, M., Oppenheim, D.E., Steele, C.R., Lewis, J.M., Glusac, E., Filler, R., Hobby, P., Sutton, B., Tigelaar, R.E., and Hayday, A.C. (2001). Regulation of cutaneous malignancy by gammadelta T cells. *Science* **294**, 605–609.
- Girardi, M., Lewis, J., Glusac, E., Filler, R.B., Geng, L., Hayday, A.C., and Tigelaar, R.E. (2002). Resident skin-specific gammadelta T cells provide local, nonredundant regulation of cutaneous inflammation. *J. Exp. Med.* **195**, 855–867.
- Harly, C., Guillaume, Y., Nedellec, S., Peigné, C.M., Mönkkönen, H., Mönkkönen, J., Li, J., Kuball, J., Adams, E.J., Netzer, S., et al. (2012). Key implication of CD277/butyrophilin-3 (BTN3A) in cellular stress sensing by a major human γδ T-cell subset. *Blood* **120**, 2269–2279.
- He, S., Kahles, F., Rattik, S., Nairz, M., McAlpine, C.S., Anzai, A., Selgrade, D., Fenn, A.M., Chan, C.T., Mindur, J.E., et al. (2019). Gut intraepithelial T cells calibrate metabolism and accelerate cardiovascular disease. *Nature* **566**, 115–119.
- Hoytema van Konijnenburg, D.P., Reis, B.S., Pedicord, V.A., Farache, J., Victora, G.D., and Mucida, D. (2017). Intestinal Epithelial and Intraepithelial T Cell Crosstalk Mediates a Dynamic Response to Infection. *Cell* **171**, 783–794.e13.
- Hsiao, C.H., Lin, X., Barney, R.J., Shippy, R.R., Li, J., Vinogradova, O., Wiemer, D.F., and Wiemer, A.J. (2014). Synthesis of a phosphoantigen produg that potently activates Vγ9Vδ2 T-lymphocytes. *Chem. Biol.* **21**, 945–954.
- Hunter, S., Willcox, C.R., Davey, M.S., Kasatskaya, S.A., Jeffery, H.C., Chudakov, D.M., Oo, Y.H., and Willcox, B.E. (2018). Human liver infiltrating γδ T cells are composed of clonally expanded circulating and tissue-resident populations. *J. Hepatol.* **69**, 654–665.
- Janeway, C.A., Jr., Jones, B., and Hayday, A. (1988). Specificity and function of T cells bearing gamma delta receptors. *Immunol. Today* **9**, 73–76.
- Krishnan, S., Prise, I.E., Wemyss, K., Schenck, L.P., Bridgeman, H.M., McClure, F.A., Zangerle-Murray, T., O'Boyle, C., Barbera, T.A., Mahmood, F., et al. (2018). Amphiregulin-producing γδ T cells are vital for safeguarding oral barrier immune homeostasis. *Proc. Natl. Acad. Sci. USA* **115**, 10738–10743.
- Lafarge, X., Pitard, V., Ravet, S., Roumanes, D., Halary, F., Dromer, C., Vivier, E., Paul, P., Moreau, J.F., and Déchanet-Merville, J. (2005). Expression of MHC class I receptors confers functional intraclonal heterogeneity to a reactive expansion of gammadelta T cells. *Eur. J. Immunol.* **35**, 1896–1905.
- Lebrero-Fernández, C., Bergström, J.H., Pelaseyed, T., and Bas-Forsberg, A. (2016a). Murine Butyrophilin-Like 1 and Btln6 Form Heteromeric Complexes in Small Intestinal Epithelial Cells and Promote Proliferation of Local T Lymphocytes. *Front. Immunol.* **7**, 1.
- Lebrero-Fernández, C., Wenzel, U.A., Akeus, P., Wang, Y., Strid, H., Simrén, M., Gustavsson, B., Börjesson, L.G., Cardell, S.L., Öhman, L., et al. (2016b). Altered expression of Butyrophilin (BTN) and BTN-like (BTNL) genes in intestinal inflammation and colon cancer. *Immun. Inflamm. Dis.* **4**, 191–200.
- Mayassi, T., Ladell, K., Gudjonson, H., McLaren, J.E., Shaw, D.G., Tran, M.T., Rokicka, J.J., Lawrence, I., Grenier, J.C., van Unen, V., et al. (2019). Chronic Inflammation Permanently Reshapes Tissue-Resident Immunity in Celiac Disease. *Cell* **176**, 967–981.e19.
- Melandri, D., Zlatareva, I., Chaleil, R.A.G., Dart, R.J., Chancellor, A., Nussbaumer, O., Polyakova, O., Roberts, N.A., Wesch, D., Kabelitz, D., et al. (2018). The γδTCR combines innate immunity with adaptive immunity by utilizing spatially distinct regions for agonist selection and antigen responsiveness. *Nat. Immunol.* **19**, 1352–1365.
- Meyer, S., Woodward, M., Hertel, C., Vlaicu, P., Haque, Y., Kärner, J., Macagno, A., Onuoha, S.C., Fishman, D., Peterson, H., et al.; APECED patient collaborative (2016). AIRE-Deficient Patients Harbor Unique High-Affinity Disease-Ameliorating Autoantibodies. *Cell* **166**, 582–595.
- Mitropoulou, A.N., Bowen, H., Dodev, T.S., Davies, A.M., Bax, H.J., Beavil, R.L., Beavil, A.J., Gould, H.J., James, L.K., and Sutton, B.J. (2018).



- Structure of a patient-derived antibody in complex with allergen reveals simultaneous conventional and superantigen-like recognition. *Proc. Natl. Acad. Sci. USA* **115**, E8707–E8716.
- Morita, C.T., Beckman, E.M., Bukowski, J.F., Tanaka, Y., Band, H., Bloom, B.R., Golan, D.E., and Brenner, M.B. (1995). Direct presentation of nonpeptide prenyl pyrophosphate antigens to human gamma delta T cells. *Immunity* **3**, 495–507.
- Morita, C.T., Jin, C., Sarikonda, G., and Wang, H. (2007). Nonpeptide antigens, presentation mechanisms, and immunological memory of human Vgamma2Vdelta2 T cells: discriminating friend from foe through the recognition of prenyl pyrophosphate antigens. *Immunol. Rev.* **215**, 59–76.
- Palakodeti, A., Sandstrom, A., Sundaresan, L., Harly, C., Nedellec, S., Olive, D., Scotet, E., Bonneville, M., and Adams, E.J. (2012). The molecular basis for modulation of human Vγ9Vδ2 T cell responses by CD277/butyrophilin-3 (BTN3A)-specific antibodies. *J. Biol. Chem.* **287**, 32780–32790.
- Parker, C.M., Groh, V., Band, H., Porcellini, S.A., Morita, C., Fabbri, M., Glass, D., Strominger, J.L., and Brenner, M.B. (1990). Evidence for extrathymic changes in the T cell receptor gamma/delta repertoire. *J. Exp. Med.* **171**, 1597–1612.
- Ravens, S., Schultze-Florey, C., Raha, S., Sandrock, I., Drenker, M., Oberdörfer, L., Reinhardt, A., Ravens, I., Beck, M., Geffers, R., et al. (2017). Human γδ T cells are quickly reconstituted after stem-cell transplantation and show adaptive clonal expansion in response to viral infection. *Nat. Immunol.* **18**, 393–401.
- Roberts, S.J., Smith, A.L., West, A.B., Wen, L., Findly, R.C., Owen, M.J., and Hayday, A.C. (1996). T-cell alpha beta + and gamma delta + deficient mice display abnormal but distinct phenotypes toward a natural, widespread infection of the intestinal epithelium. *Proc. Natl. Acad. Sci. USA* **93**, 11774–11779.
- Salim, M., Knowles, T.J., Hart, R., Mohammed, F., Woodward, M.J., Willcox, C.R., Overduin, M., Hayday, A.C., and Willcox, B.E. (2016). Characterization of a Putative Receptor Binding Surface on Skint-1, a Critical Determinant of Dendritic Epidermal T Cell Selection. *J. Biol. Chem.* **291**, 9310–9321.
- Salim, M., Knowles, T.J., Baker, A.T., Davey, M.S., Jeeves, M., Sridhar, P., Wilkie, J., Willcox, C.R., Kadri, H., Taher, T.E., et al. (2017). BTN3A1 Discriminates γδ T Cell Phosphoantigens from Nonantigenic Small Molecules via a Conformational Sensor in Its B30.2 Domain. *ACS Chem. Biol.* **12**, 2631–2643.
- Sandstrom, A., Peigné, C.M., Léger, A., Crooks, J.E., Konczak, F., Gesnel, M.C., Breathnach, R., Bonneville, M., Scotet, E., and Adams, E.J. (2014). The intracellular B30.2 domain of butyrophilin 3A1 binds phosphoantigens to mediate activation of human Vγ9Vδ2 T cells. *Immunity* **40**, 490–500.
- Scotet, E., Martinez, L.O., Grant, E., Barbaras, R., Jenö, P., Guiraud, M., Monsarrat, B., Saulquin, X., Maillet, S., Estève, J.P., et al. (2005). Tumor recognition following Vgamma9Vdelta2 T cell receptor interactions with a surface F1-ATPase-related structure and apolipoprotein A-I. *Immunity* **22**, 71–80.
- Shin, S., El-Diwany, R., Schaffert, S., Adams, E.J., Garcia, K.C., Pereira, P., and Chien, Y.H. (2005). Antigen recognition determinants of gammadelta T cell receptors. *Science* **308**, 252–255.
- Shires, J., Theodoridis, E., and Hayday, A.C. (2001). Biological insights into TCRgamma delta+ and TCRalpha beta+ intraepithelial lymphocytes provided by serial analysis of gene expression (SAGE). *Immunity* **15**, 419–434.
- Stites, W.E. (1997). Protein-Protein Interactions: Interface Structure, Binding Thermodynamics, and Mutational Analysis. *Chem. Rev.* **97**, 1233–1250.
- Strid, J., Roberts, S.J., Filler, R.B., Lewis, J.M., Kwong, B.Y., Schpero, W., Kaplan, D.H., Hayday, A.C., and Girardi, M. (2008). Acute upregulation of an NKG2D ligand promotes rapid reorganization of a local immune compartment with pleiotropic effects on carcinogenesis. *Nat. Immunol.* **9**, 146–154.
- Sundberg, E.J., Deng, L., and Mariuzza, R.A. (2007). TCR recognition of peptide/MHC class II complexes and superantigens. *Semin. Immunol.* **19**, 262–271.
- Turchinovich, G., and Hayday, A.C. (2011). Skint-1 identifies a common molecular mechanism for the development of interferon-γ-secreting versus interleukin-17-secreting γδ T cells. *Immunity* **35**, 59–68.
- Vantourout, P., Laing, A., Woodward, M.J., Zlatareva, I., Apolonia, L., Jones, A.W., Sniijders, A.P., Malim, M.H., and Hayday, A.C. (2018). Heteromeric interactions regulate butyrophilin (BTN) and BTN-like molecules governing γδ T cell biology. *Proc. Natl. Acad. Sci. USA* **115**, 1039–1044.
- Vavassori, S., Kumar, A., Wan, G.S., Ramanjaneyulu, G.S., Cavallari, M., El Daker, S., Beddoe, T., Theodossis, A., Williams, N.K., Gostick, E., et al. (2013). Butyrophilin 3A1 binds phosphorylated antigens and stimulates human γδ T cells. *Nat. Immunol.* **14**, 908–916.
- Willcox, B.E., and Willcox, C.R. (2019). γδ TCR ligands: the quest to solve a 500-million-year-old mystery. *Nat. Immunol.* **20**, 121–128.
- Willcox, B.E., Gao, G.F., Wyer, J.R., Ladbury, J.E., Bell, J.I., Jakobsen, B.K., and van der Merwe, P.A. (1999). TCR binding to peptide-MHC stabilizes a flexible recognition interface. *Immunity* **10**, 357–365.
- Willcox, C.R., Pitard, V., Netzer, S., Couzi, L., Salim, M., Silberzahn, T., Moreau, J.F., Hayday, A.C., Willcox, B.E., and Déchanet-Merville, J. (2012). Cytomegalovirus and tumor stress surveillance by binding of a human γδ T cell antigen receptor to endothelial protein C receptor. *Nat. Immunol.* **13**, 872–879.
- Winn, M.D., Ballard, C.C., Cowtan, K.D., Dodson, E.J., Emsley, P., Evans, P.R., Keegan, R.M., Krissinel, E.B., Leslie, A.G., McCoy, A., et al. (2011). Overview of the CCP4 suite and current developments. *Acta Crystallogr. D Biol. Crystallogr.* **67**, 235–242.
- Yang, J., Yan, R., Roy, A., Xu, D., Poisson, J., and Zhang, Y. (2015). The I-TASSER Suite: protein structure and function prediction. *Nat. Methods* **12**, 7–8.
- Zennou, V., Perez-Caballero, D., Göttlinger, H., and Bieniasz, P.D. (2004). APOBEC3G incorporation into human immunodeficiency virus type 1 particles. *J. Virol.* **78**, 12058–12061.

## STAR★METHODS

## KEY RESOURCES TABLE

| REAGENT or RESOURCE                                        | SOURCE                                                  | IDENTIFIER                                    |
|------------------------------------------------------------|---------------------------------------------------------|-----------------------------------------------|
| <b>Antibodies</b>                                          |                                                         |                                               |
| V $\gamma$ 7-AF647 (clone F2.67)                           | P. Peirera, Institut Pasteur, Paris, France             | N.A.                                          |
| $\gamma\delta$ TCR-PerCPeFluor710 (clone GL3)              | Invitrogen                                              | Cat#46-5711-82; LOT 4324311; RRID: AB_2016638 |
| $\gamma\delta$ TCR-APC (clone GL3)                         | Biolegend                                               | Cat#118116; LOT B228498; RRID: AB_1731813     |
| CD69-PE (clone FN50)                                       | Biolegend                                               | Cat#310906; LOT B258744; RRID: AB_314840      |
| CD3-PerCPeCy5.5 (clone SK7)                                | Biolegend                                               | Cat#344808; LOT B253485; RRID: AB_10641704    |
| CD3-BV421 (clone SK7)                                      | Biolegend                                               | Cat#344833; LOT B250131; RRID: AB_2565674     |
| His-tag-APC (clone J095G46)                                | Biolegend                                               | Cat#362605; LOT B250305; RRID: AB_2715818     |
| FLAG (unlabeled) (clone L5)                                | Biolegend                                               | Cat#637302; LOT B185582; RRID: AB_1134268     |
| FLAG-PE (clone L5)                                         | Biolegend                                               | Cat#637310; LOT B182164; RRID: AB_2563148     |
| FLAG-APC (clone L5)                                        | Biolegend                                               | Cat#637308; LOT B182164; RRID: AB_2561497     |
| HA (unlabelled) (clone 16B12)                              | Biolegend                                               | Cat#901502; LOT B242905; RRID: AB_2565007     |
| HA-AF647 (clone 16B12)                                     | Biolegend                                               | Cat#682404; LOT B246404; RRID: AB_2566616     |
| Mouse IgG1 isotype control (clone MOPC-1)                  | Biolegend                                               | Cat#400166; LOT B230982; RRID: AB_11146992    |
| CD3-BV421 (clone OKT3)                                     | Biolegend                                               | Cat#317344; LOT 248594; RRID: AB_2565849      |
| CD3-AF647 (clone OKT3)                                     | Biolegend                                               | Cat#317312; LOT B224782; RRID: AB_571883      |
| CD69-AF647 (clone FN50)                                    | Biolegend                                               | Cat#310918; LOT B246313; RRID: AB_528871      |
| $\gamma\delta$ TCR-PECy7 (clone IMMU510)                   | Beckman Coulter                                         | Cat#B10247; LOT 33                            |
| TCRV $\delta$ 2-FITC (clone B6)                            | Biolegend                                               | Cat#331406; LOT B224768; RRID: AB_1089230     |
| CD107a-PE (clone H4A3)                                     | Biolegend                                               | Cat#328608 ; LOT B264921; RRID: AB_1186040    |
| Purified mouse anti-human TCR $\gamma/\delta$ , clone 11F2 | BD Biosciences                                          | Cat# 347900; RRID: AB_400356                  |
| BTNL3 (unlabelled, rabbit polyclonal)                      | Aviva Systems Biology                                   | Cat#ARP46769_P050; RRID: AB_2045124           |
| <b>Bacterial and Virus Strains</b>                         |                                                         |                                               |
| StbI2                                                      | ThermoFisher                                            | Cat#10268019                                  |
| NEB 5-alpha                                                | NEB                                                     | Cat#C2987H                                    |
| BL21 (DE3)                                                 | NEB                                                     | Cat#C2527H                                    |
| <b>Biological Samples</b>                                  |                                                         |                                               |
| HMBPP expanded human V $\gamma$ 9V $\delta$ 2+ T cells     | <a href="#">Vantourout et al., 2018</a>                 | N/A                                           |
| <b>Chemicals, Peptides, and Recombinant Proteins</b>       |                                                         |                                               |
| Soluble monomeric V $\gamma$ 4V $\delta$ 1 TCR, His-tagged | GammaDelta Therapeutics                                 | N/A                                           |
| NdeI                                                       | Roche                                                   | Cat#11 040 227 001                            |
| BamHI                                                      | Roche                                                   | Cat#10 567 604 001                            |
| BTNL3 IgV                                                  | This paper                                              | N/A                                           |
| BTNL8 IgV                                                  | This paper                                              | N/A                                           |
| Soluble T cell receptors (sTCRs)                           | <a href="#">Willcox et al., 2012</a> and this paper     | N/A                                           |
| Soluble EPCR                                               | <a href="#">Willcox et al., 2012</a> and this paper     | N/A                                           |
| <b>Experimental Models: Cell Lines</b>                     |                                                         |                                               |
| J76 (human)                                                | Francis Crick Institute (FCI) Cell Services             | N/A                                           |
| MODE-K (mouse)                                             | Gift from Dr. D. Kaiserlian, INSERM U1111, Lyon, France | N/A                                           |

(Continued on next page)

**Continued**

| REAGENT or RESOURCE                                    | SOURCE                                                                        | IDENTIFIER                                                                                                                                                                          |
|--------------------------------------------------------|-------------------------------------------------------------------------------|-------------------------------------------------------------------------------------------------------------------------------------------------------------------------------------|
| JRT3 (human)                                           | Gift from Dr. S. Mansour, University of Southampton                           | N/A                                                                                                                                                                                 |
| 293T (human)                                           | ATCC                                                                          | N/A                                                                                                                                                                                 |
| 293T BTNL variants and EV cell lines                   | Di Marco Barros et al., 2016; Vantourout et al., 2018; Melandri et al., 2018  | N/A                                                                                                                                                                                 |
| MODE-K Btln variants and EV cell lines                 | Di Marco Barros et al., 2016; Melandri et al., 2018                           | N/A                                                                                                                                                                                 |
| 293T CRA123 (BTN3 locus deletion)                      | Vantourout et al., 2018                                                       | N/A                                                                                                                                                                                 |
| J76/JRT3 TCR variants                                  | This paper and Melandri et al., 2018                                          | N/A                                                                                                                                                                                 |
| Oligonucleotides                                       |                                                                               |                                                                                                                                                                                     |
| Full length cloning primers for BTN3, Btln, BTNL       | Di Marco Barros et al., 2016; Vantourout et al., 2018; Melandri et al., 2018; | N/A                                                                                                                                                                                 |
| Recombinant DNA                                        |                                                                               |                                                                                                                                                                                     |
| pCSIGPW, pCSIYHW                                       | Di Marco Barros et al., 2016                                                  | N/A                                                                                                                                                                                 |
| pCR/V1                                                 | Zennou et al., 2004                                                           | N/A                                                                                                                                                                                 |
| pHIT/G                                                 | Fouchier et al., 1997                                                         | N/A                                                                                                                                                                                 |
| pET23a                                                 | Merck Millipore                                                               | Cat#69745-3                                                                                                                                                                         |
| pMT/BiP/V5-HisB                                        | Invitrogen                                                                    | Cat#V413020                                                                                                                                                                         |
| FLAG-Btln1 in pCSIYHW                                  | Di Marco Barros et al., 2016                                                  | N/A                                                                                                                                                                                 |
| HA-Btln6 in pCSIGPW                                    | Di Marco Barros et al., 2016                                                  | N/A                                                                                                                                                                                 |
| Human and mouse $\gamma\delta$ TCRs in pCSIGW          | This paper and Melandri et al., 2018                                          | N/A                                                                                                                                                                                 |
| FLAG-BTNL3 in pCSIGPW                                  | This paper and Melandri et al., 2018                                          | N/A                                                                                                                                                                                 |
| HA-BTNL3 in pCSIGPW                                    | This paper and Melandri et al., 2018                                          | N/A                                                                                                                                                                                 |
| FLAG-BTN3A1 in pCSIGPW                                 | This paper and Vantourout et al., 2018                                        | N/A                                                                                                                                                                                 |
| HA-BTN3A2 in pCSIGPW                                   | This paper and Vantourout et al., 2018                                        | N/A                                                                                                                                                                                 |
| BTNL3 IgV in pET23a (wild type and mutants)            | This paper                                                                    | N/A                                                                                                                                                                                 |
| BTNL8 IgV in pET23a                                    | This paper                                                                    | N/A                                                                                                                                                                                 |
| Human and mouse $\gamma\delta$ TCRs in pMT/BiP/V5-HisB | This paper and Willcox et al., 2012                                           | N/A                                                                                                                                                                                 |
| EPCR in pMT/BiP/V5-HisB                                | Willcox et al., 2012                                                          | N/A                                                                                                                                                                                 |
| Software and Algorithms                                |                                                                               |                                                                                                                                                                                     |
| FlowJo version 10                                      | FlowJo LLC                                                                    | <a href="https://www.flowjo.com/">https://www.flowjo.com/</a>                                                                                                                       |
| PyMOL version 2.0.7                                    | Schrodinger LLC                                                               | <a href="https://pymol.org">https://pymol.org</a>                                                                                                                                   |
| GraphPad Prism version 8.0.2                           | GraphPad Software LLC                                                         | <a href="https://www.graphpad.com">https://www.graphpad.com</a>                                                                                                                     |
| BIAevaluation                                          | GE Healthcare                                                                 | <a href="https://www.gelifesciences.com/en/gb/shop/protein-analysis/spr-label-free-analysis">https://www.gelifesciences.com/en/gb/shop/protein-analysis/spr-label-free-analysis</a> |
| Origin 2015                                            | OriginLab                                                                     | <a href="https://www.originlab.com/">https://www.originlab.com/</a>                                                                                                                 |
| Other                                                  |                                                                               |                                                                                                                                                                                     |
| Sensor Chip CM5                                        | GE Healthcare                                                                 | 29149604                                                                                                                                                                            |
| Sensor Chip NTA                                        | GE Healthcare                                                                 | BR100407                                                                                                                                                                            |
| HBS-P                                                  | GE Healthcare                                                                 | BR100368                                                                                                                                                                            |
| HBS-EP                                                 | GE Healthcare                                                                 | BR100188                                                                                                                                                                            |
| Streptavidin                                           | Sigma                                                                         | S4622                                                                                                                                                                               |

**LEAD CONTACT AND MATERIALS AVAILABILITY**

For additional information about reagents and resources, contact the lead contact, Benjamin E. Willcox, at [b.willcox@bham.ac.uk](mailto:b.willcox@bham.ac.uk).

## METHOD DETAILS

### Soluble Protein Production

cDNA encoding wt BTNL3 or BTNL8 IgV domains (Q18 to V131), or BTNL3 IgV incorporating the described mutations, were generated as gblocks (Integrated DNA Technologies) including the sequence for a C-terminal 6x Histidine tag, cloned into the pET23a expression vector (Novagen), and were overexpressed in *E. coli* BL21 (DE3) strain (NEB). Protein expression was induced by addition of 0.5mM isopropyl-b-D-1-thiogalactopyranoside and culture for 4 hours at 37°C. The bacterial cell pellet was harvested by centrifugation at 7500 g for 20 min, resuspended in PBS and lysed by mechanical disruption using an Emulsiflex C3. The overexpressed inclusion body protein was isolated by centrifugation at 44000 g for 30 min. The pellet was washed three times in 50mM Tris, pH8, 0.5% Triton X-100, 2 mM DTT, and 0.1% sodium azide, and once in 50 mM Tris, pH8, 2 mM DTT, and 0.1% sodium azide, then solubilised in 8 M urea, 50 mM MES, pH 6.5, 1 mM EDTA, 2 mM DTT. BTNL3 or BTNL8 inclusion body proteins were further reduced by addition of fresh 20 mM DTT for 30 min at 37°C immediately prior to refolding. BTNL3 IgV was refolded by dilution in 100 mM Tris, 400 mM L-Arginine-HCl, 2 mM EDTA, 6.8 mM cystamine, 2.7 mM cysteamine, 0.1 mM PMSF, pH 8, overnight at 4°C. BTNL8 IgV was refolded as described for Skint1 IgV (Salim et al., 2016). The refolding mixture was concentrated down and purified by size exclusion chromatography on a Superdex-200 column (GE Healthcare) pre-equilibrated with 20 mM Tris, 150 mM NaCl, pH 8, or PBS. Soluble  $\gamma\delta$  TCRs (LES TCR ( $V\gamma 4^+$ ; wt and mutants),  $V\gamma 2^+$  TCR,  $V\gamma 3^+$  TCR and mouse  $V\gamma 7^+$  TCR) and soluble EPCR were generated in *Drosophila* S2 cells and purified by nickel chromatography as previously described (Willcox et al., 2012). Mutant  $V\gamma 4$  and  $V\delta 5$  constructs were generated using the Quickchange site-directed mutagenesis kit (Stratagene) of wt LES TCR constructs in pMT/BiP/HisB (Invitrogen) (Willcox et al., 2012). TCRs were then biotinylated via a C-terminal BirA tag. Soluble  $V\gamma 4V\delta 1$  TCRs used to stain 293T.L3L8 cells were described previously (Melandri et al., 2018).

### Surface Plasmon Resonance

SPR was performed as described (Willcox et al., 1999) on a BIAcore3000 using streptavidin-coated CM5 chips and HBS-EP buffer (GE Healthcare). Biotinylated wt or mutant LES TCR and control  $V\gamma 2$  or  $V\gamma 3$  TCRs (1000-3500 RU), were captured on the Streptavidin chip. Analyte concentrations ranged from 1-200  $\mu$ M. The BTNL3-EPCR competition assay was performed by immobilising 2500-3000 RU of wt EPCR or control protein (EPCR R127A mutant, which abrogated binding to LES TCR), (Willcox et al., 2012) on the surface of the chip. Injections of LES TCR at a constant concentration of 12.5  $\mu$ M were performed in the presence of increasing concentrations of BTNL3 IgV (3.5-113  $\mu$ M), or BTNL8 IgV (2.2-70.5  $\mu$ M). Binding of BTNL3 polyclonal antibody was measured following immobilisation of His-tagged BTNL3 IgV mutants to an NTA Sensor Chip in HBS-P (GE Healthcare).

### Isothermal Titration Calorimetry

Calorimetric measurements were carried out using an iTC200 instrument (Malvern Panalytical, Malvern, UK). All experiments were performed at 20°C, with proteins purified in 20mM Tris pH 8, 50 mM NaCl. Typically, TCR proteins were contained in the calorimeter cell at a concentration of 70  $\mu$ M, into which BTNL3 proteins at a ten-fold higher molar concentration were titrated as 20  $\times$  2  $\mu$ l injections. All ITC binding experiments were corrected for heats of dilution. Binding data were analyzed by fitting the binding isotherm to a single independent binding site model using Origin software.

### Cell Lines

293T and MODE-K cells were maintained in DMEM supplemented with 4.5 g/L D-glucose, L-glutamine, 10% heat-inactivated fetal calf serum (FCS) and 1% penicillin-streptomycin (Complete DMEM). JRT3 and Jurkat 76 (J76) were maintained in RPMI 1640 with L-glutamine, 10% heat-inactivated FCS and 1% penicillin-streptomycin (Complete RPMI). All cell culture reagents were from Thermo Fisher. Polyclonal  $V\gamma 9V\delta 2$  T cell lines were generated from PBMC from healthy donors after informed consent as described previously (Vantourout et al., 2018).

### Reagents

Transduced 293T and MODE-K cells were grown in Complete DMEM supplemented with 1  $\mu$ g/mL puromycin (Sigma-Aldrich) alone or in combination with 500 ng/mL hygromycin B (Thermo Fisher). Polyethylenimine was from Polysciences. Zoledronate (Zol) was from Sigma-Aldrich.

### Mutagenesis and Molecular Biology

Plasmids encoding hu17 (human  $V\gamma 4V\delta 1$ ), huPB (human  $V\gamma 9V\delta 2$ ) and mo5 (murine  $V\gamma 7V\delta 2-2$ ) TCRs, and BTNL and Btl variants, and BTN3A1 and BTN3A2 have been described (Melandri et al., 2018; Vantourout et al., 2018). Chimeric and mutant TCRs were generated using overlap-extension PCR (OE-PCR) and cloned into the self-inactivating lentiviral vector pCSIGPW after removal of the IRES-GFP and CMVp-Puro<sup>R</sup> cassettes. OE-PCR was likewise used to mutate BTN3A1 and BTN3A2, which were subsequently cloned into pCSIGPW.

### Lentiviral Transduction

Lentiviral particles were produced in wild-type 293T cells by co-transfection with lentiviral plasmids encoding target proteins (derived from pCSIGPW), HIV-1 *gag-pol* pCR/V1 (Zennou et al., 2004) and VSV-G *env* pHIT/G (Fouchier et al., 1997) using PEI. Medium was

replaced after 16 h and collected 48 h post-transfection, filtered through 0.45  $\mu\text{m}$  nylon mesh, and used to transduce target cell lines. JRT3/J76 cells were transduced by spinoculation at 1,000  $g$ , 20°C for 30 min.  $5 \times 10^5$  293T cells/well were plated in a 12-well plate a day prior to transduction. The following day, supernatants from the packaging cell lines were mixed 1:1 and 1.5 mL was used to transduce plated 293T cells. Culture medium was supplemented with antibiotics for selection 24 h post-transduction. Transductants were bulk-sorted on uniform GFP expression.

### Co-culture Assay

$0.5 \times 10^5$  JRT3/J76 transductants or PBMC-derived polyclonal  $V\gamma 9V\delta 2$  T cells were mixed in 96-well plates with  $1.5 \times 10^5$  293T or MODE-K cells, followed by co-culture for 5 h. 293T transiently expressing BTNL3 and BTNL8 (293T.L3L8) were used in blocking experiments. 48 h post-transfection, 293T cells were harvested and pre-incubated for 30 min at 4°C with  $\alpha$ -FLAG,  $\alpha$ -HA or IgG control antibodies (L5, 16B12, MG1-45 respectively; BioLegend). JRT3 were subsequently added and the cells were co-cultured for 3h at 37°C in the presence of the antibodies. For blocking experiments of murine Btl molecules, MODE-K stably expressing Btl1+Btl6 (MODE-K.I1.I6) were pre-incubated for 60 min at 37°C with  $\alpha$ -FLAG,  $\alpha$ -HA or IgG control antibodies in 96-well plates. J76-mo5 were added to the wells and cells were co-cultured for 5h in the presence of the antibodies. 293T-CRA123 cells were transiently transfected with BTN3 constructs. Media was replaced 24 h post-transfection with Complete DMEM supplemented with Zol (10  $\mu\text{M}$ ). Cells were maintained for 16 h, washed twice, and co-cultured with JRT3 transductants or PBMC-derived polyclonal  $V\gamma 9V\delta 2$  T cell lines as described above.

### Flow Cytometry

Flow cytometry was performed using the following antibodies from BioLegend, unless otherwise stated. Antibodies to the following human molecules were used: CD69-AF647 (FN50), CD69-PE (FN50), CD3-BV421 (OKT3),  $\gamma\delta$ TCR-PeCy7 (IMMU510; Beckman Coulter), CD45-PacificBlue (HI30), TCRV $\delta 2$ -FITC (B6). Antibodies to the following murine molecules were used: TCR $\delta$ -PerCPe710 (GL3), TCR $\delta$ -APC (GL3),  $V\gamma 7$ -AF647 (F2.67, provided by P.Pereira). Other antibodies were as follows: DYKDDDDK-PE (FLAG, L5), HA-AF647 (16B12), 6xHis-APC (Biolegend, J095G46). Data were acquired on BD Canto II or Fortessa cytometers. sTCR staining was performed as in [Melandri et al. \(2018\)](#).

### Software

Flow cytometry data were analyzed in FlowJo (versions 9 and 10; FlowJo, LLC) and Prism (version 7; GraphPad). Structural figures were generated in PyMOL (version 2.0.7; Schrodinger, LLC). For SPR and ITC, data were analyzed in BIAevaluation (GE Healthcare) and Origin 2015 (OriginLab).

### Molecular Modeling

Molecular models of the BTNL-3 and BTNL-8 IgV-IgC domains were derived from the I-TASSER server ([Yang et al., 2015](#)). BTNL-3 and BTNL-8 IgV-IgC domain models were then superimposed onto the equivalent regions of previously published BTN3A1 structure adopting either the V-shaped or head-to-tail dimer ([Palakodeti et al., 2012](#)). Residues that contribute to stabilizing BTN3A1 and BTNL-3/BTNL-8 dimer interfaces were identified using programs of the CCP4 suite ([Winn et al., 2011](#)).

## QUANTIFICATION AND STATISTICAL ANALYSIS

Flow cytometry data were analysed in FlowJo (versions 9 and 10; FlowJo) and Prism (version 7; GraphPad). Structural figures were generated in PyMOL (version 2.0.7; Schrodinger). For SPR and ITC, data were analysed in BIAevaluation (GE Healthcare) and Origin 2015 (OriginLab).

## DATA AND CODE AVAILABILITY

There is no data or availability to report.



**Immunity, Volume 51**

## **Supplemental Information**

**Butyrophilin-like 3 Directly Binds a Human V $\gamma$ 4<sup>+</sup>**

**T Cell Receptor Using a Modality**

**Distinct from Clonally-Restricted Antigen**

**Carrie R. Willcox, Pierre Vantourout, Mahboob Salim, Iva Zlatareva, Daisy Melandri, Leonor Zanardo, Roger George, Svend Kjaer, Mark Jeeves, Fiyaz Mohammed, Adrian C. Hayday, and Benjamin E. Willcox**

# Supplementary Figure 1

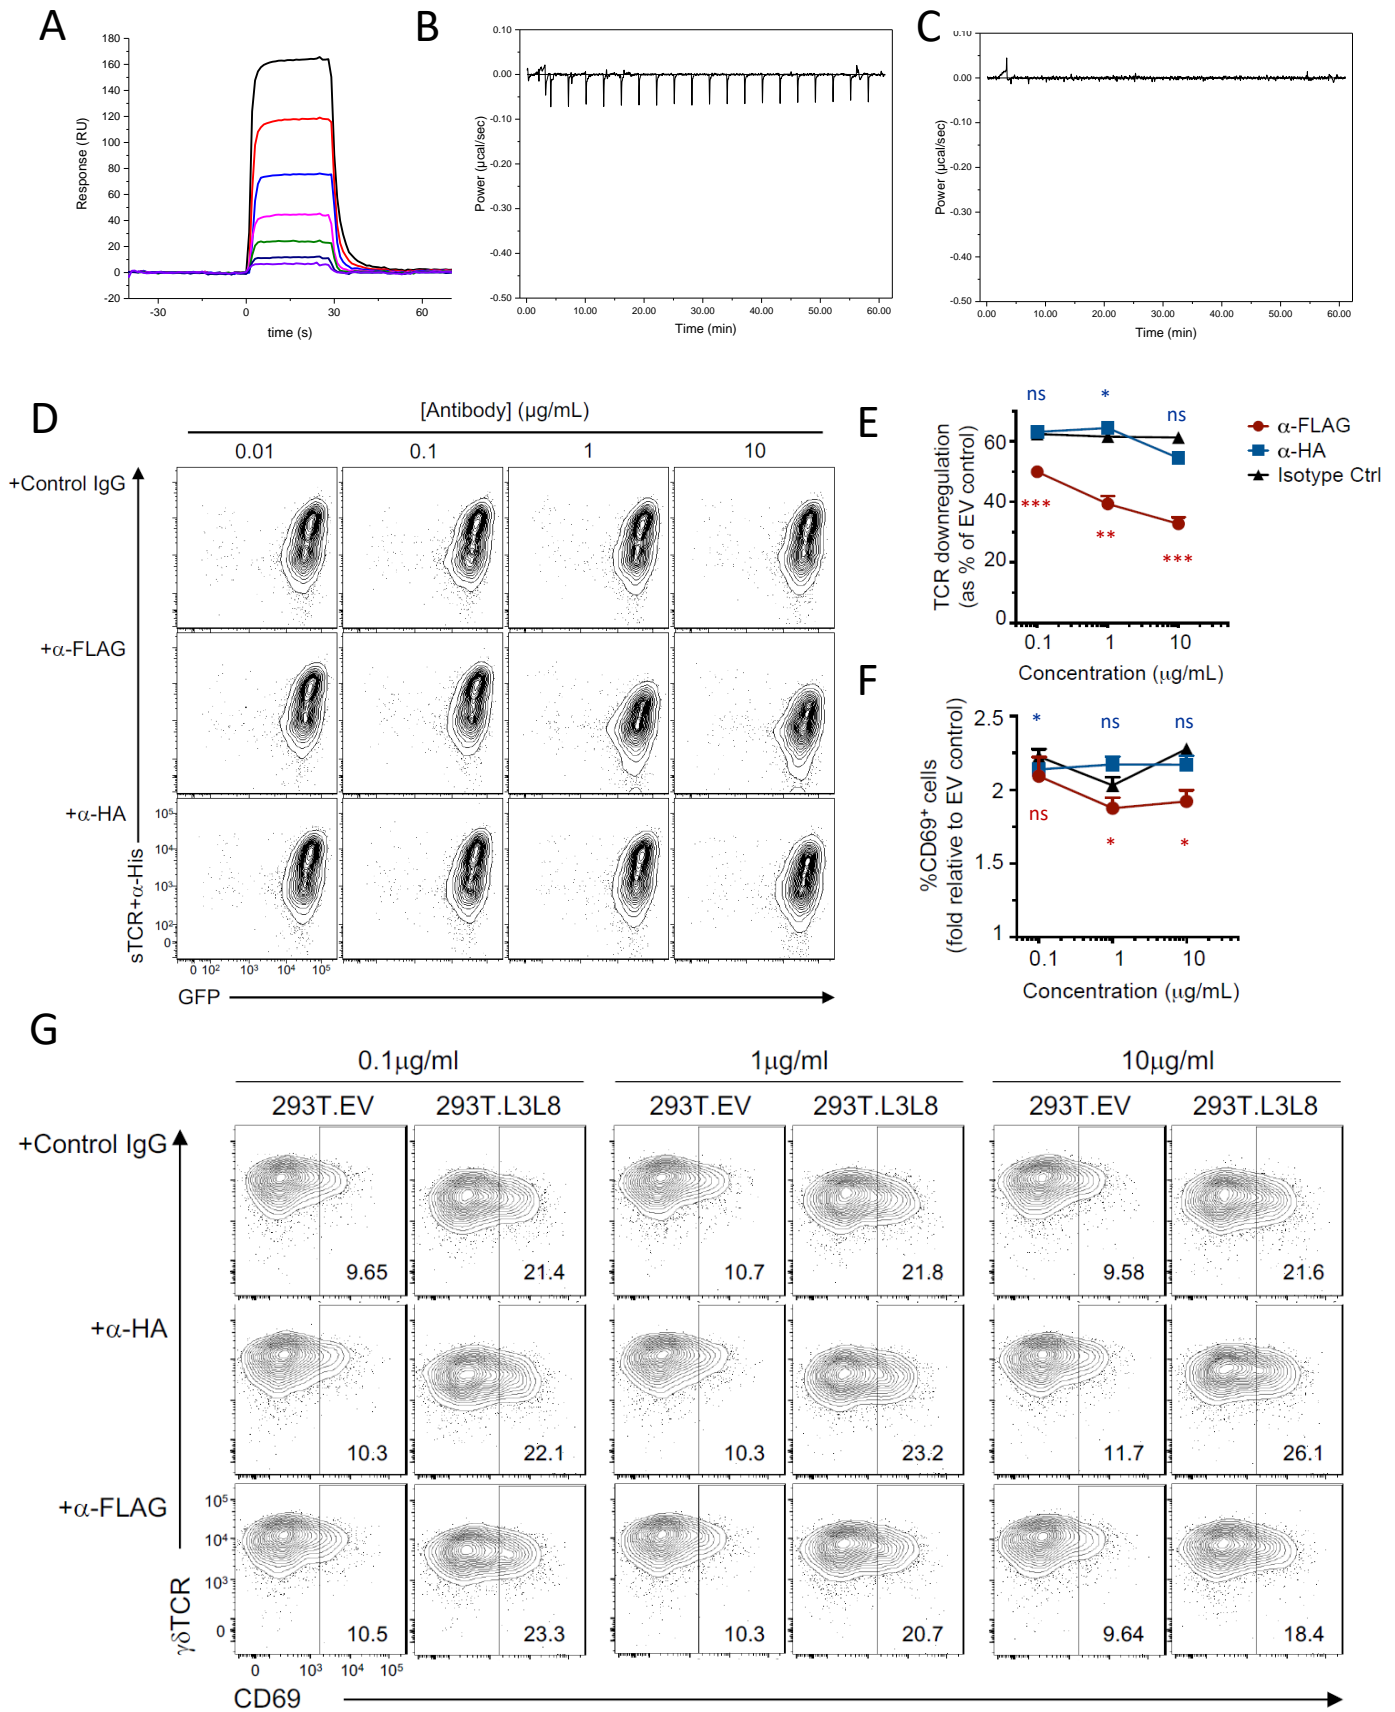

Supplementary Figure 1 - related to main text Figure 1. (A) Equilibrium binding of BTN3 IgV (0.6-36  $\mu$ M) to V $\gamma$ 4 TCR immobilised on the sensor surface (1805 RU). Responses to a control TCR (1872 RU) have been subtracted. Raw ITC traces showing injection of BTN3 IgV domain into solution containing V $\gamma$ 2 TCR (B) or V $\gamma$ 3 TCR (C). (D) Representative flow-cytometry analysis of soluble V $\gamma$ 4V $\delta$ 1 TCR binding to 293T.FLAG-L3.HA-L8 cells (visualized by anti-His) following pre-incubation with indicated concentrations of anti-FLAG, anti-HA or IgG control antibodies (see Figure 1F). (E,F) Flow-cytometry analysis of TCR downregulation and CD69 upregulation by JRT3 cells transduced with hu17 V $\gamma$ 4V $\delta$ 1 TCR and co-cultured for 3 h with transfected 293T.FLAG-L3.HA-L8 cells in the presence of the indicated concentrations of anti-FLAG (red) or anti-HA (blue) antibody; results were normalized to those obtained by co-culture with transfected 293T.EV cells in the presence of the same antibody concentrations. Data are representative of three independent experiments (mean  $\pm$  s.d. of  $n = 3$  co-cultures). \* $p < 0.05$ , \*\* $p < 0.01$ , \*\*\* $p < 0.001$  (paired two-tailed Student's t-test). Red indicates anti-FLAG *versus* isotype; blue indicates anti-HA *versus* isotype. (G) Representative flow plots for the data from (E,F).

# Supplementary Figure 2

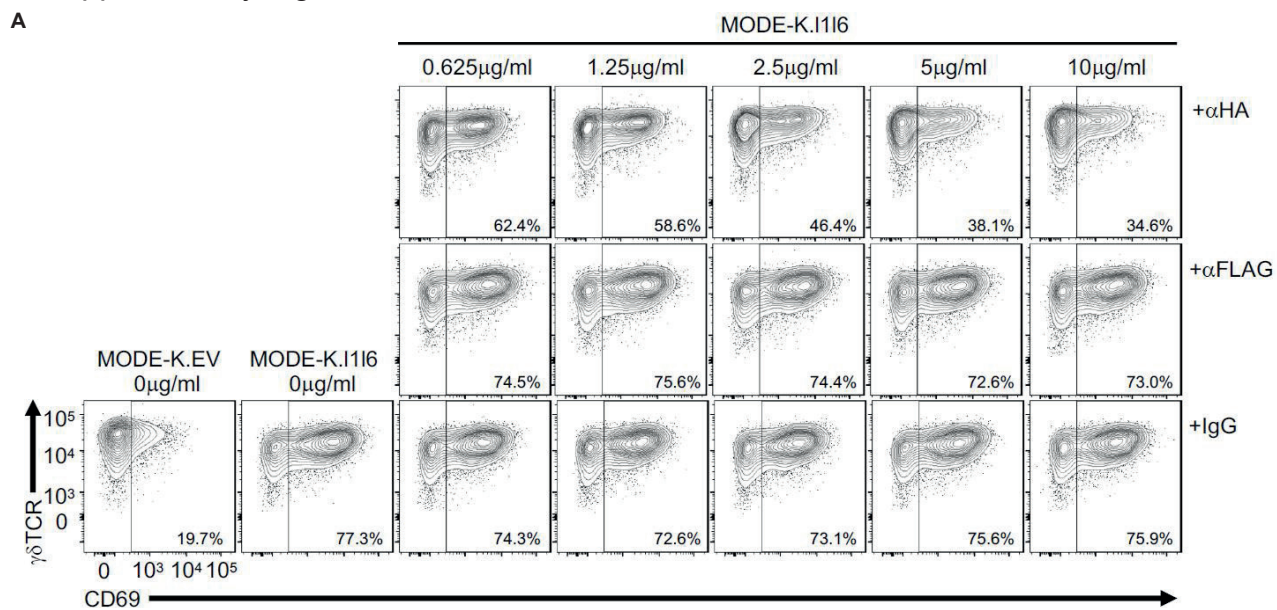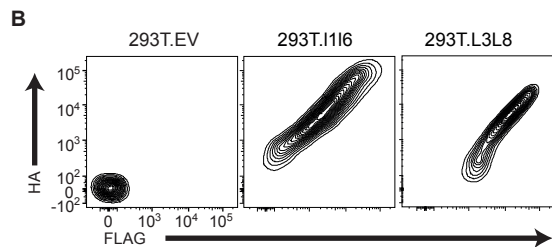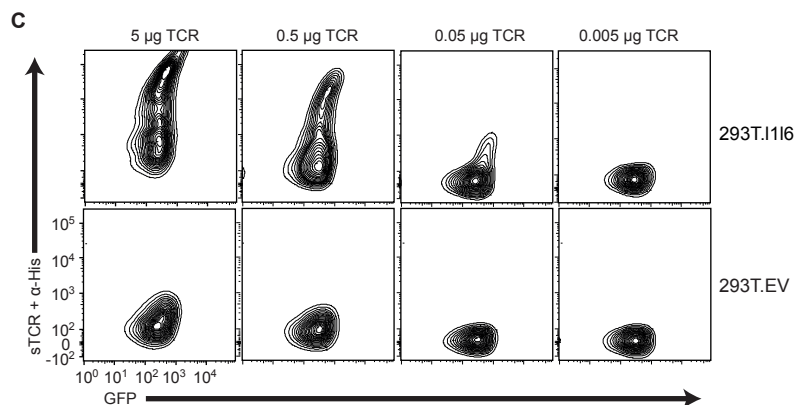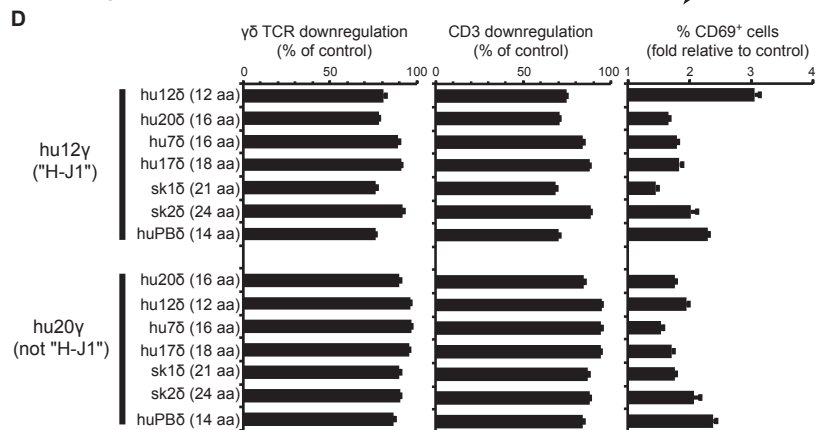

Supplementary Figure 2 - related to main text Figure 2. (A) Flow cytometry analysis of TCR downregulation and CD69 upregulation by Jurkat 76 cells transduced with mo6 V $\gamma$ 7V $\delta$ 2-2 TCR and co-cultured with MODE-K.FLAG-I1.HA-I6 cells in the presence of the indicated concentrations of antibodies (x-axis). Data are representative of three independent experiments. (B) Flow cytometry analysis of 293T cells transduced to express FLAG-I1.HA-I6 or FLAG-L3.HA-L8, stained with anti-FLAG and anti-HA antibody. (C) Flow cytometry of 293T.I1I6 or 293T.EV cells stained with the indicated concentrations of soluble mouse V $\gamma$ 7V $\delta$ 7 TCR and anti-His mAb complexes. (D) Flow cytometry analysis of CD3/TCR downregulation and CD69 upregulation by JRT3 cells expressing hu12 $\gamma$  (contains the H-J1 motif) or hu20 $\gamma$  (does not contain the H-J1 motif) paired with V $\delta$ 1 chains of varying CDR3 lengths and sequences (Melandri et al., 2018) co-cultured with 293T.L3L8 for 3h. Results were normalised to those obtained by co-culture with 293T.EV cells. Data are representative of three independent experiments (mean  $\pm$  s.d. of  $n = 3$  co-cultures).



# Supplementary Figure 3

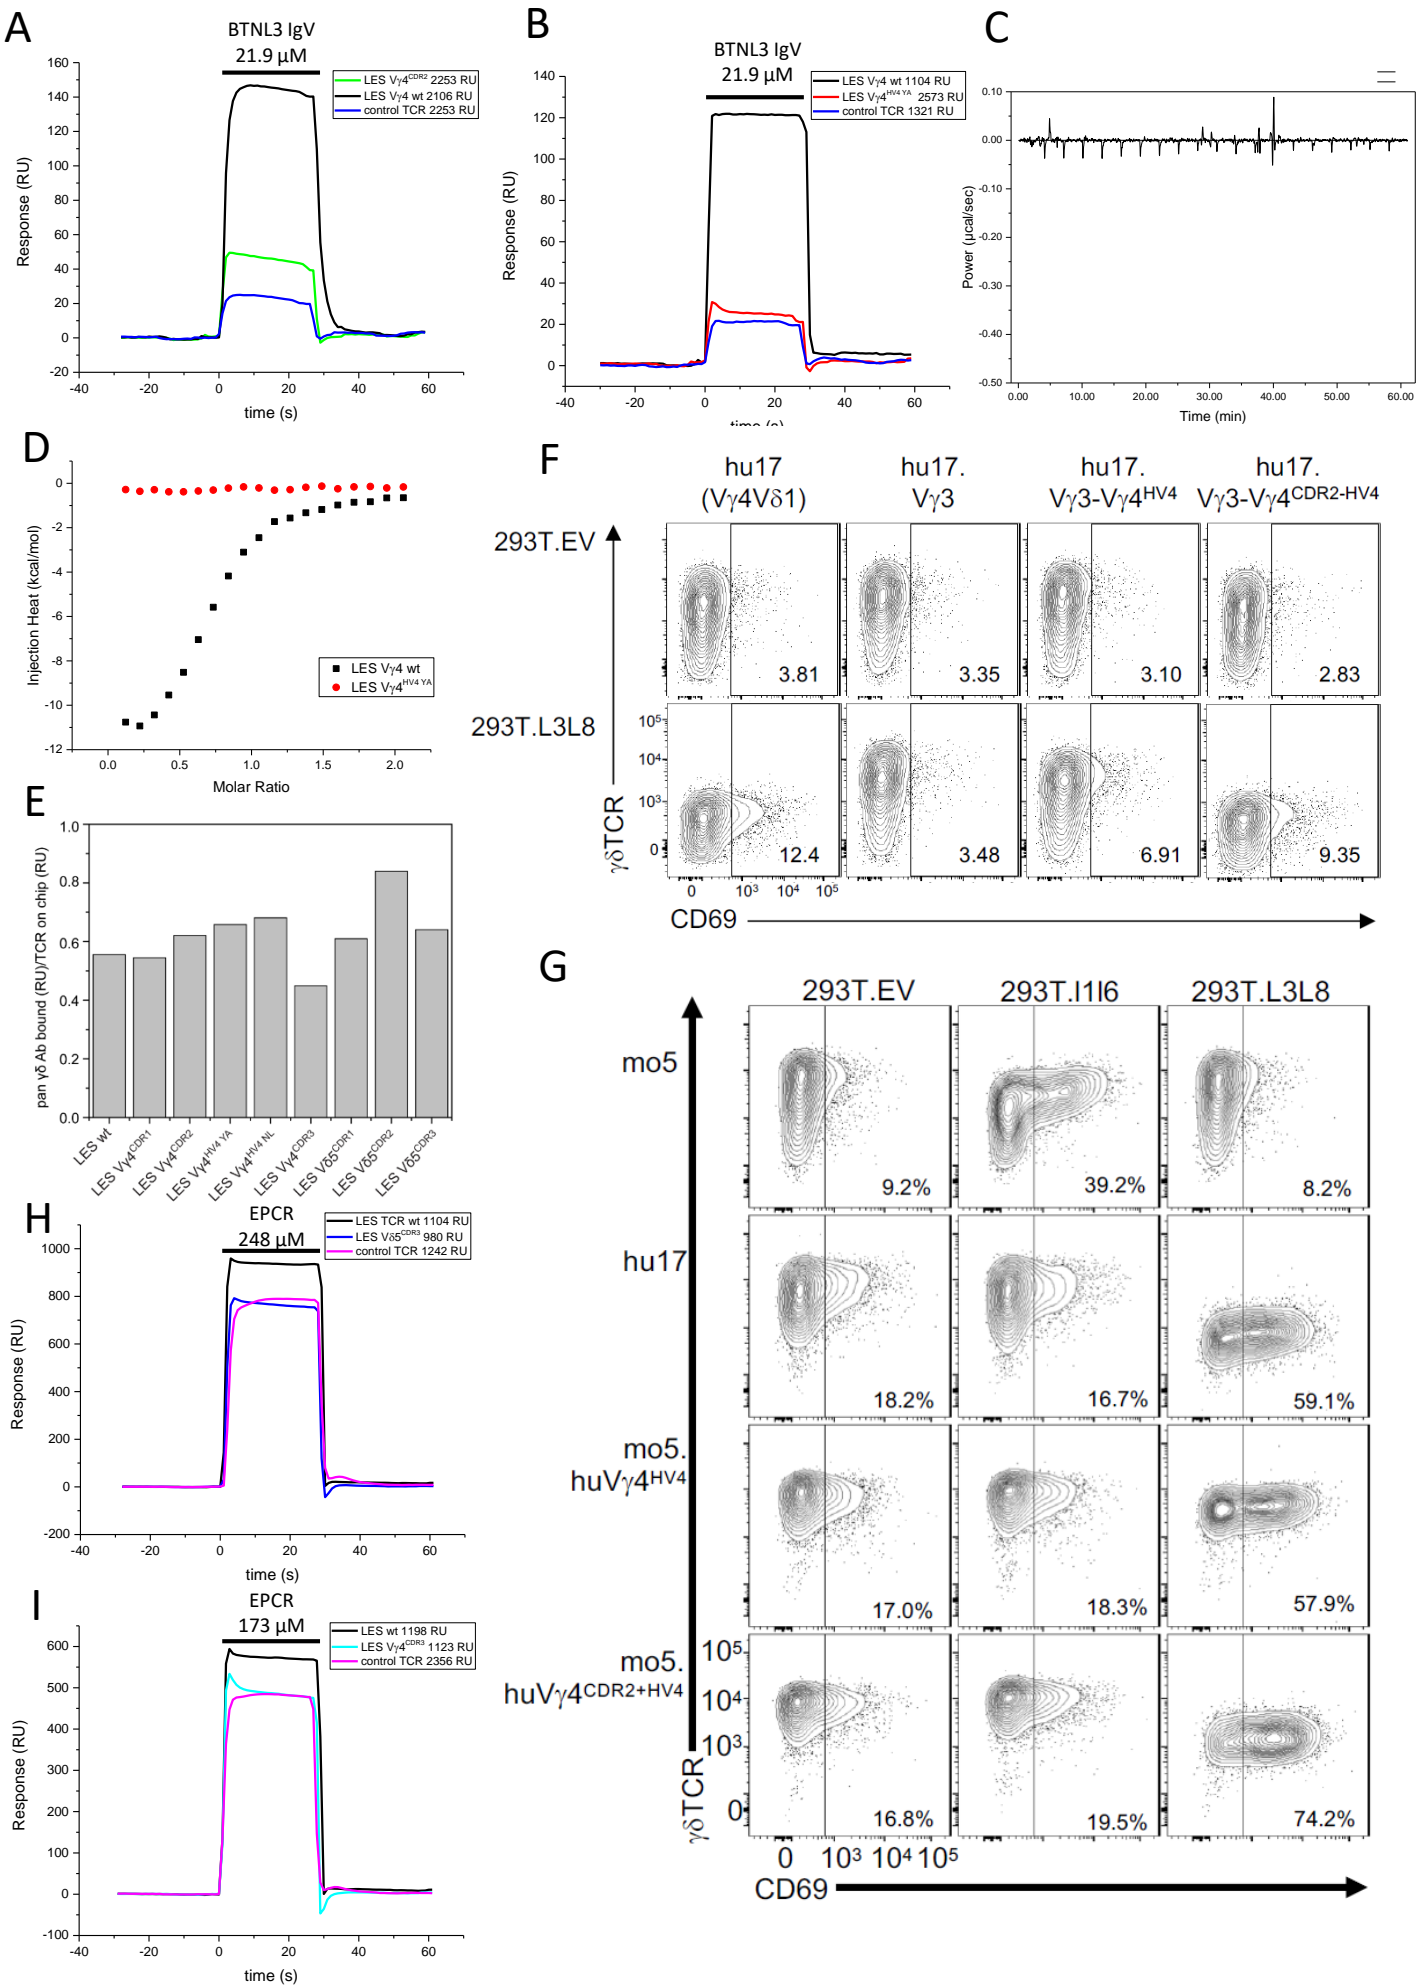

Supplementary Figure 3 - related to main text Figure 3. (A-B) Representative SPR analysis of BTNL3 IgV (21.9 $\mu$ M) injected (horizontal bar) over (A) LES V $\gamma$ 4 wt, LES V $\gamma$ 4<sup>CDR2</sup> mutant, and control TCR, or (B) LES V $\gamma$ 4 wt, LES V $\gamma$ 4<sup>HV4 YA</sup> mutant, and control TCR. (C,D) ITC analysis indicates negligible binding between BTNL3 and the LES V $\gamma$ 4<sup>YA</sup> TCR mutant. (E) Binding of anti- $\gamma\delta$  TCR mAb 11F2 (RU) relative to amount of wt or mutant TCR on the chip surface (RU). (F) Representative flow plots for the data shown in Figure 3C. (G) Representative flow plots for the data shown in Figure 3D,E. (H-I) Representative SPR analysis of EPCR (248  $\mu$ M or 173  $\mu$ M) injected (horizontal bar) over (H) wt LES TCR, LES V $\delta$ 5<sup>CDR3</sup> mutant, and control TCR, or (I) wt LES TCR, LES V $\gamma$ 4<sup>CDR3</sup> mutant, and control TCR.

# Supplementary Figure 4

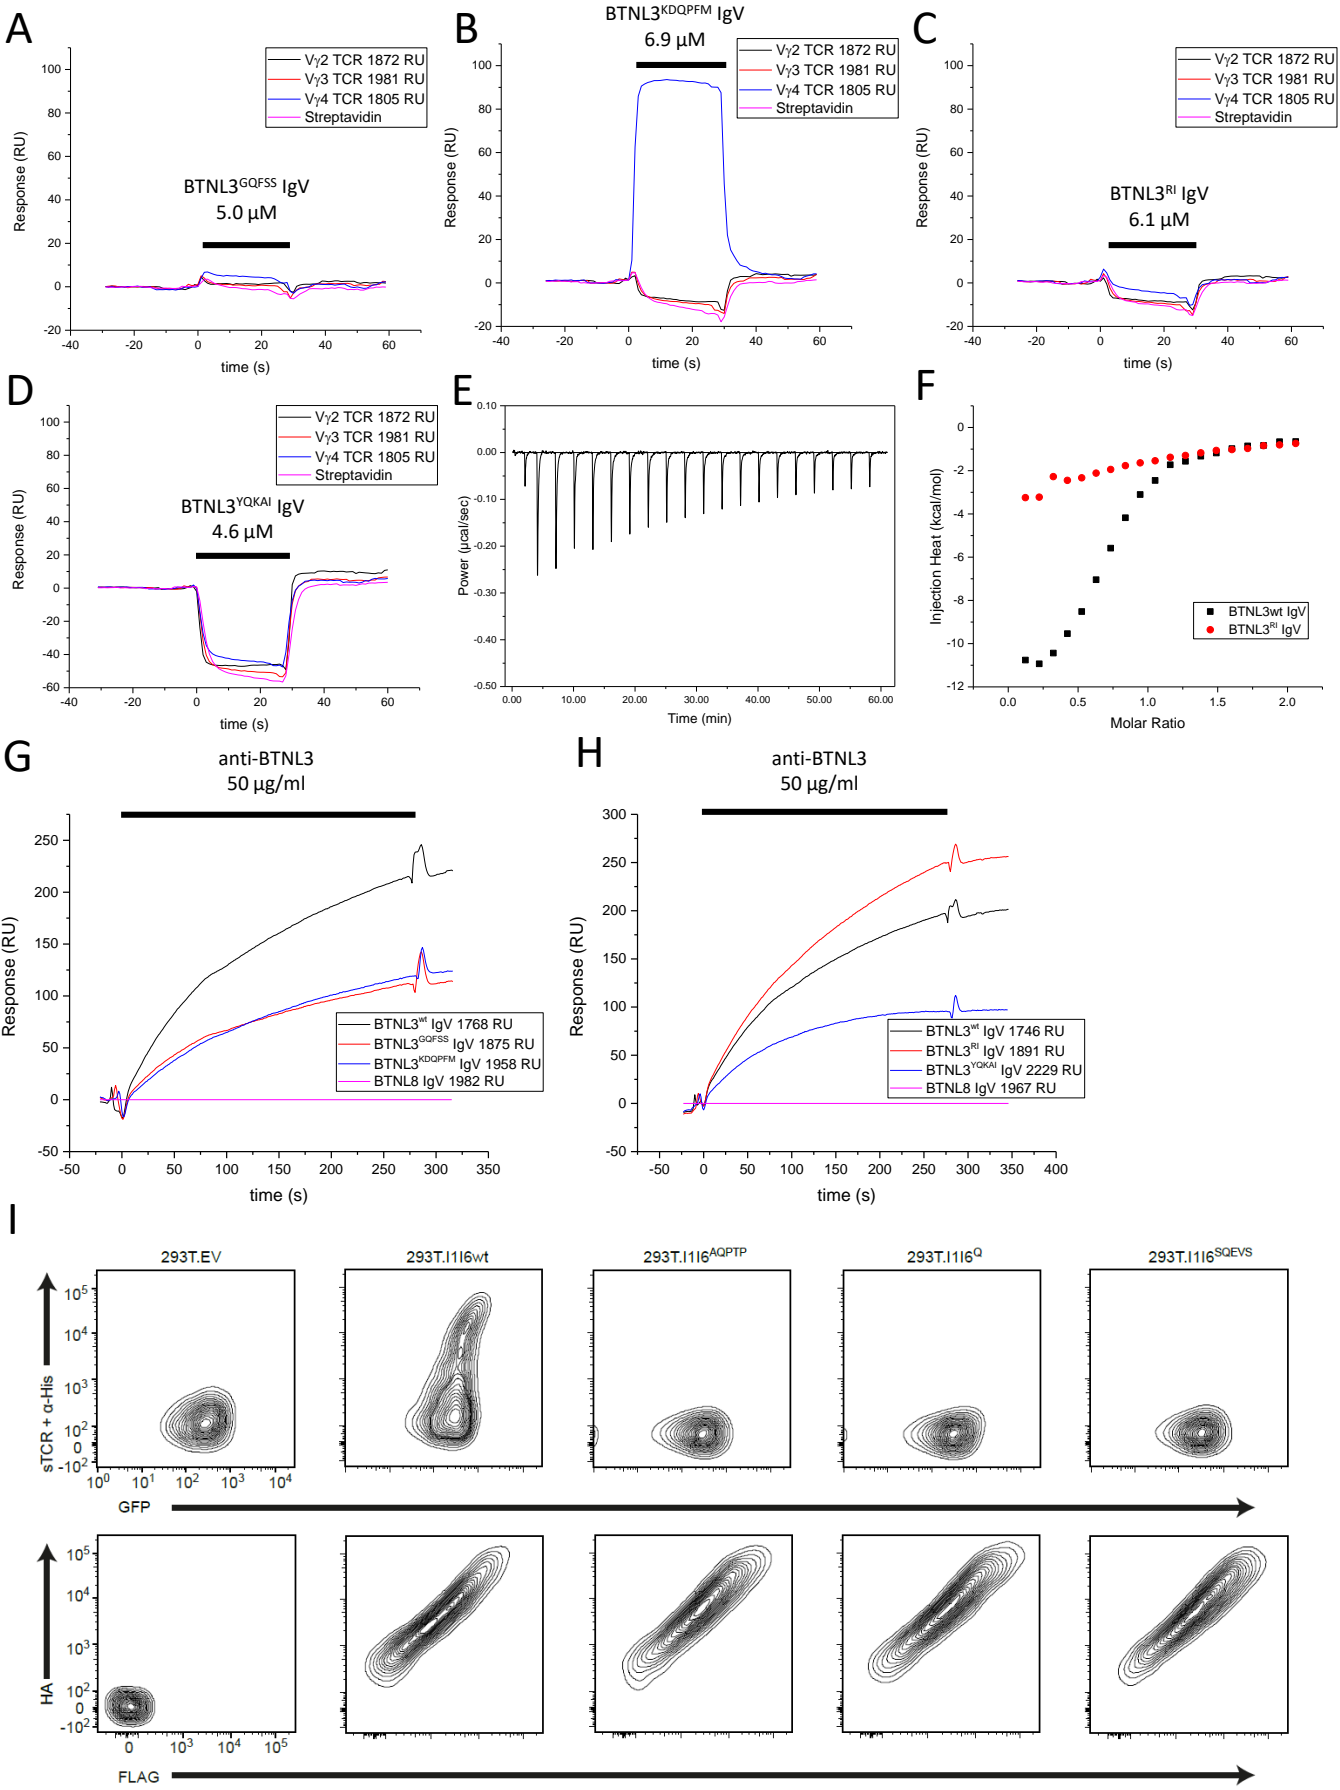

### J V-shaped dimer interface contacts based on BTN3A1 ectodomain crystal lattice (PDB entry 4F80)

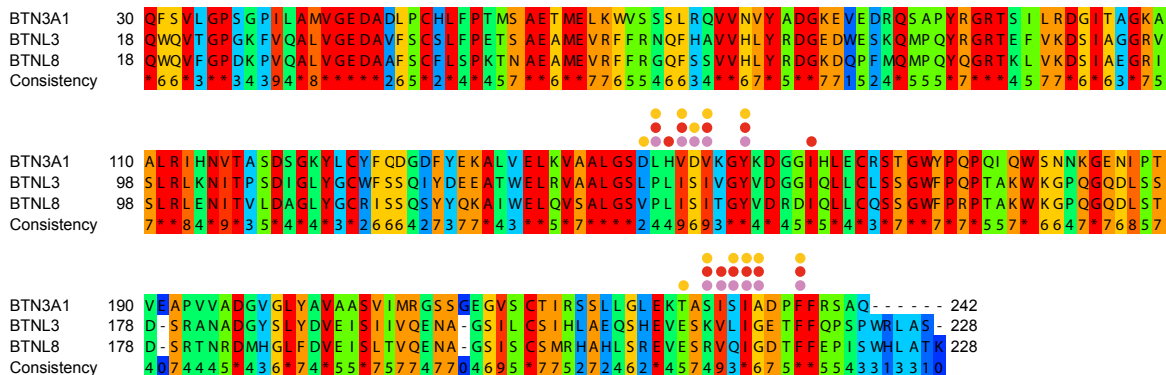

### K

### Head-to-tail dimer interface contacts based on BTN3A1 ectodomain crystal lattice (PDB entry 4F80)

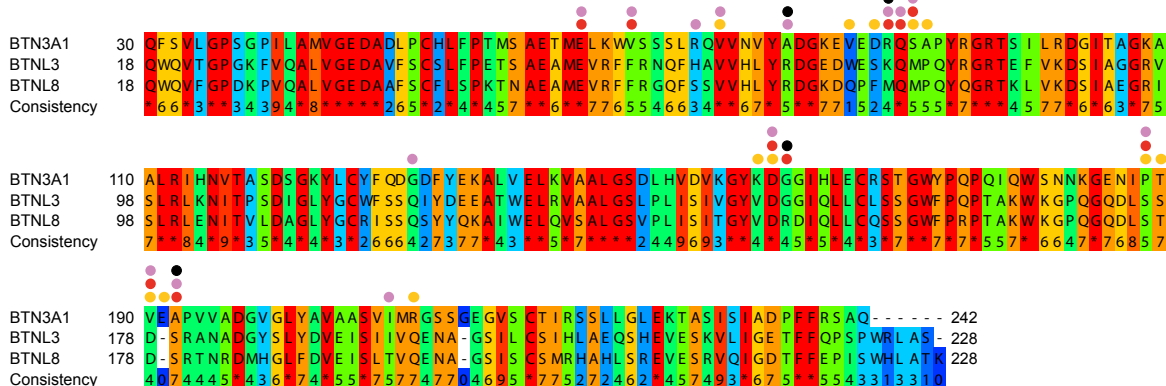

Unconserved 0 1 2 3 4 5 6 7 8 9 10 Conserved

Supplementary Figure 4 - related to main text Figure 4. V $\gamma$ 4+ TCR interaction with BTNL3 mutants (A-D) Negligible binding of BTNL3<sup>GQFSS</sup> (A), BTNL3<sup>RI</sup> (C) and BTNL3<sup>YQKAI</sup> (D) mutants injected (horizontal bar) in HBS-EP over immobilised V $\gamma$ 4 or control TCRs, whereas BTNL3<sup>KDQPFM</sup> binds with an affinity of 11.2 $\mu$ M. Negative signals reflect residual amounts of Tris buffer in which purified protein was stored. (E-F) ITC analysis showing injection of BTNL3<sup>RI</sup> mutant into solution containing wt LES V $\gamma$ 4 TCR ( $K_d \sim 50\mu$ M). (G,H) Binding of anti-BTNL3 antibody to wt or mutant BTNL3 IgV proteins immobilised via His tag to a NTA Sensor Chip. (I) V $\gamma$ 7+ TCR/anti-His staining of 293T target cells expressing Btln1 and either wt or mutant Btln6. (J-K). BTNL3.8 ectodomain is likely to adopt a V-shaped dimer configuration observed in the BTN3A1 crystal lattice. (J) Alignment of IgV-IgC sequences from human BTN3A1, BTNL3 and BTNL8. Sequences were retrieved from Uniprot (accession numbers 000481 (BTN3A1), Q6UXE8 (BTNL3) and Q63UX41 (BTNL8)). Alignment was performed using the PRALINE multiple sequence alignment toolkit (Bawono and Heringa, 2014) with the colour scheme showing the degree of amino acid conservation. Residues that contribute to stabilising the V-shaped and head to tail dimer interface are shown for BTN3A1 (yellow circles), BTNL3 (pink circles) and BTNL8 (red circles). Residues that stabilise the V-shaped dimer are relatively highly conserved between BTN3A1 and BTNL3 and BTNL8, whereas side chains that contribute to the head-to-tail interface are less well conserved. (K) Residues that may prevent the formation of the BTNL3/BTNL8 head-to-tail heterodimer due to steric and/or electrostatic incompatibility are highlighted (black circles).



# Supplementary Figure 5

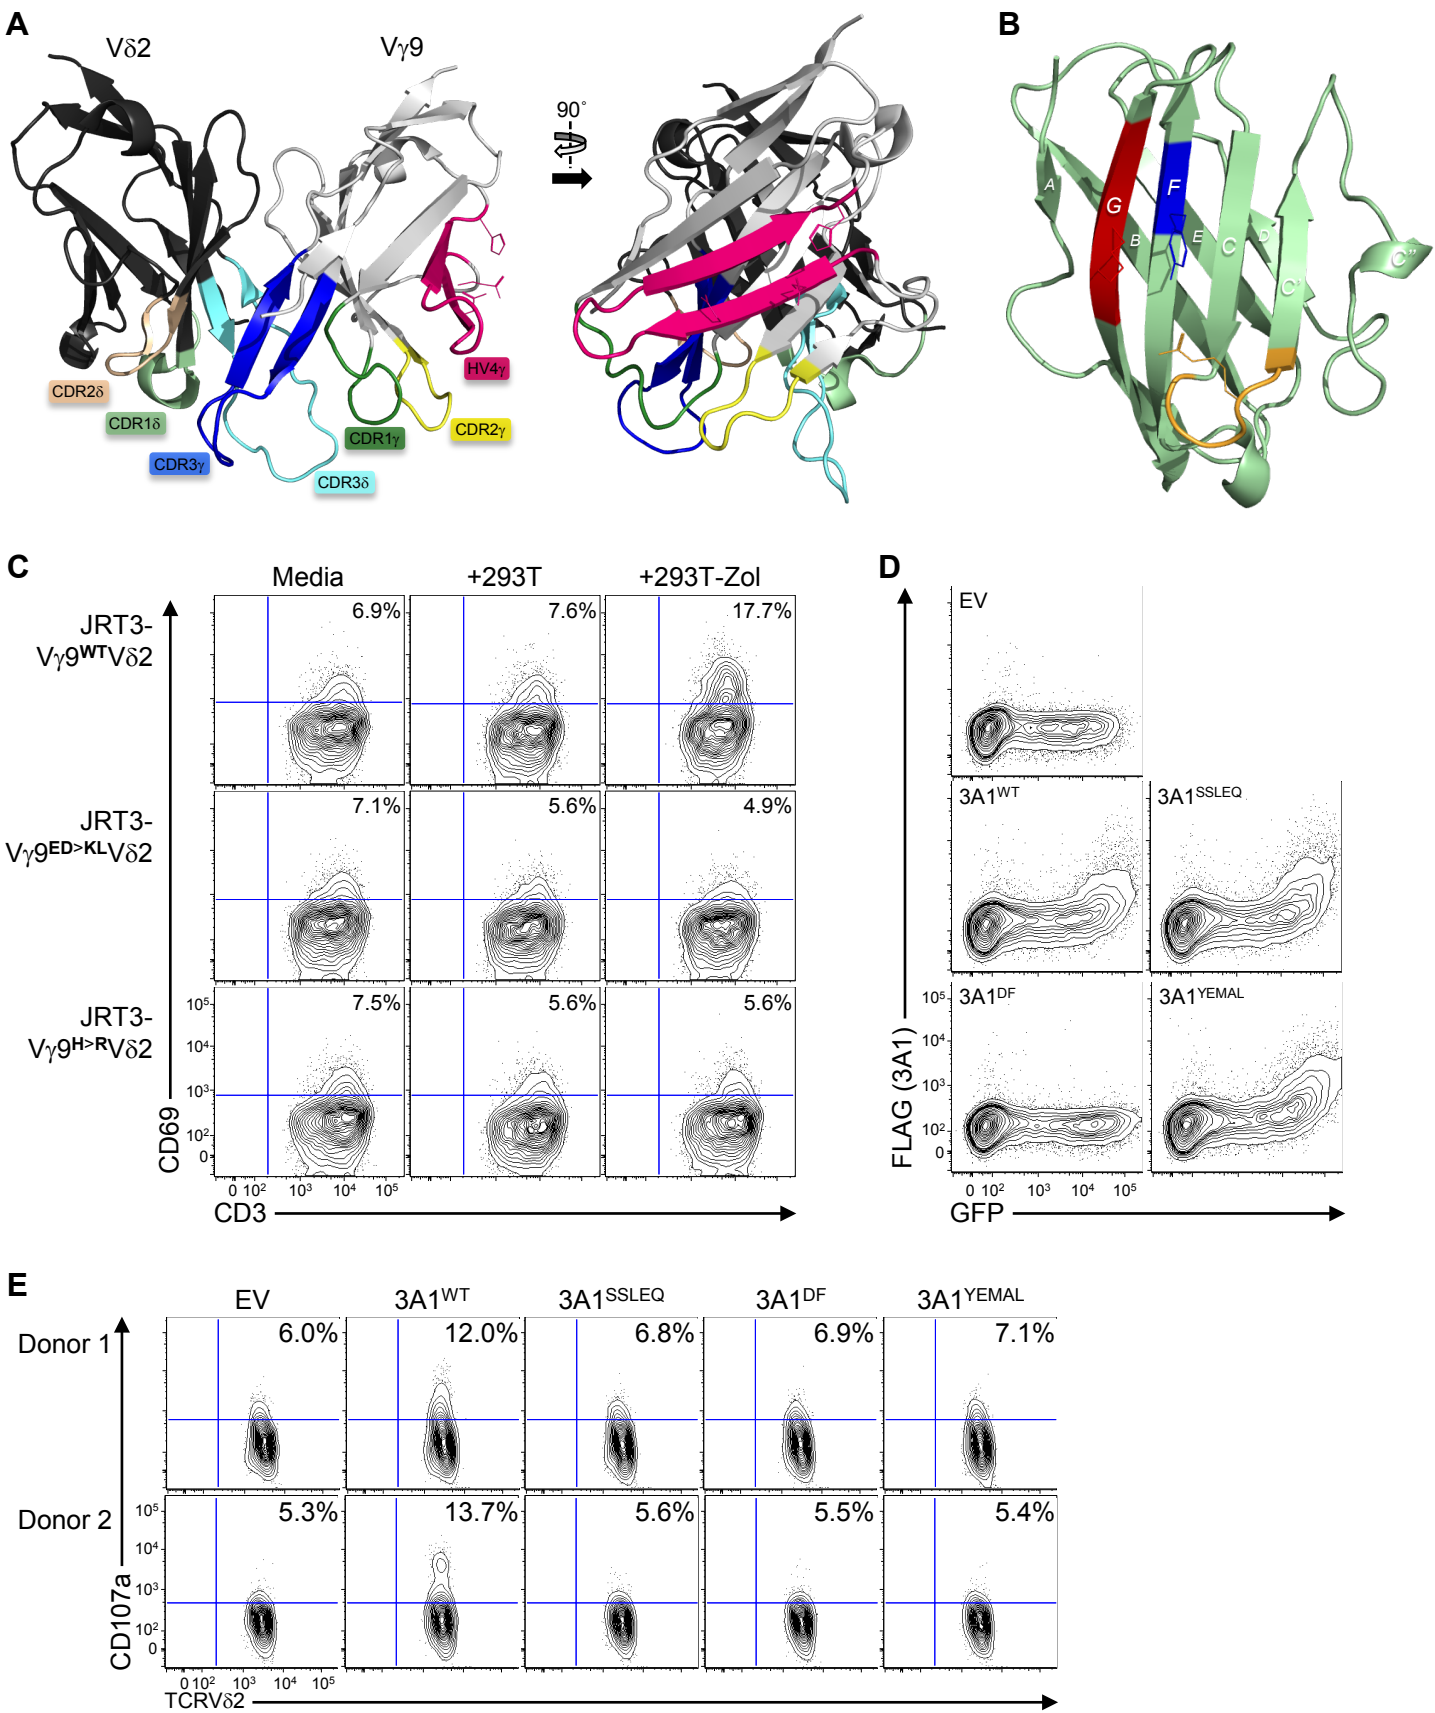

**F**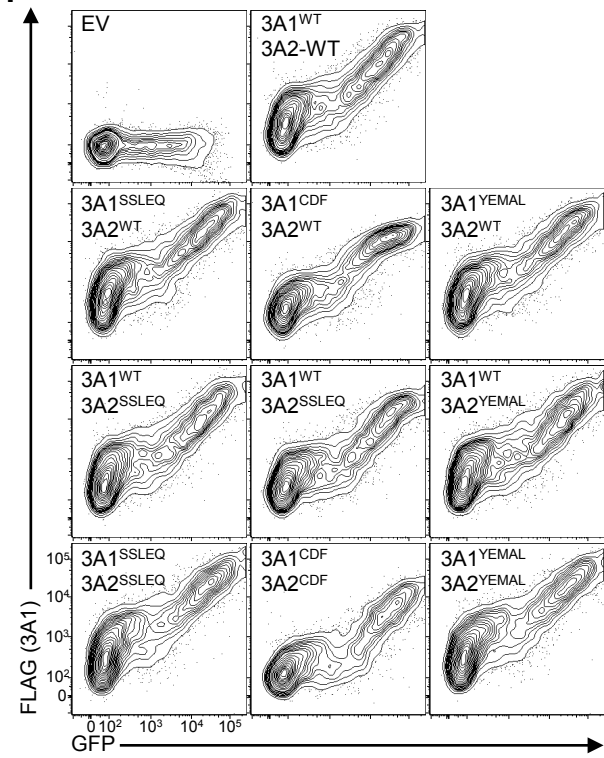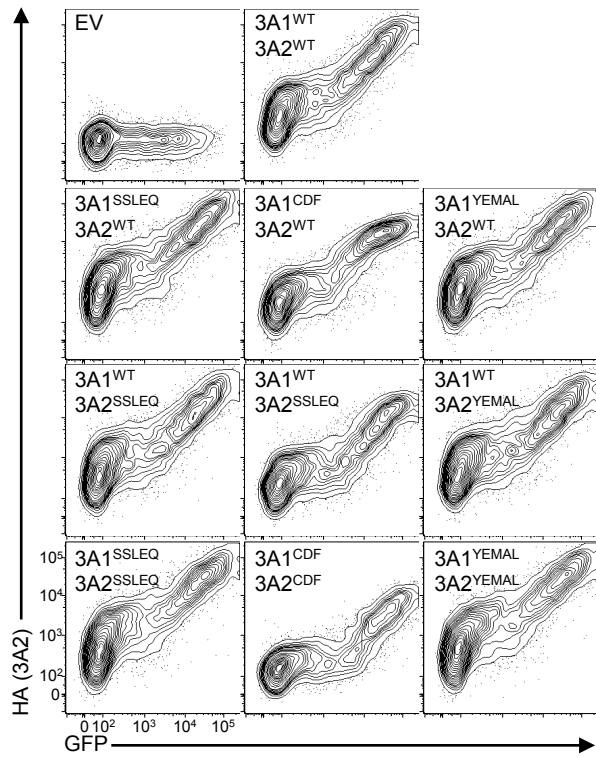**G**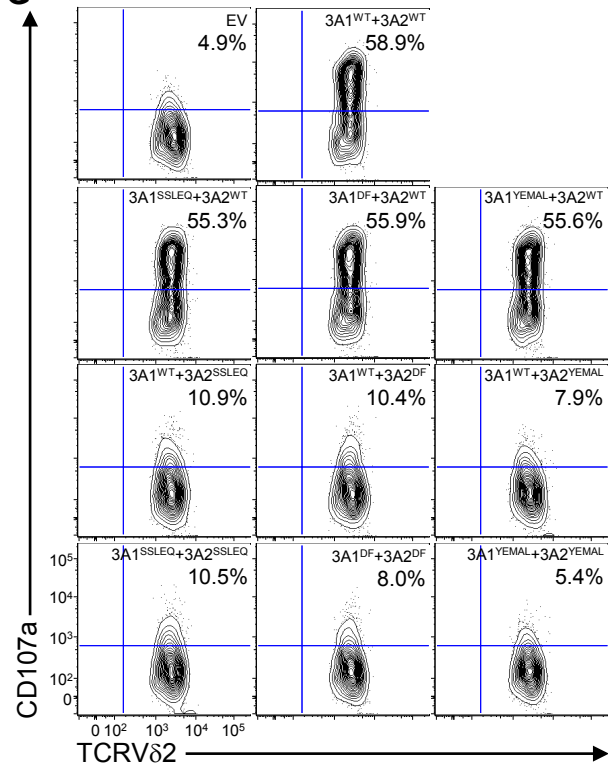**I**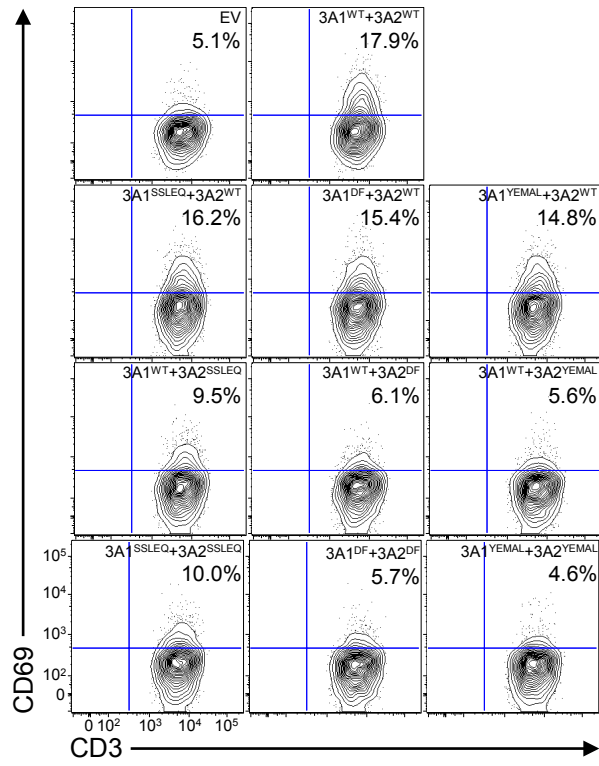**H**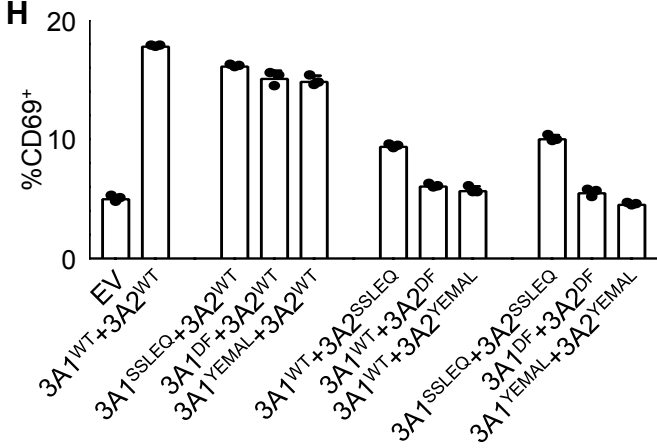

Supplementary Figure 5 - related to main text Figure 5. (A) Cartoon representation of the G115 V $\gamma$ 9V $\delta$ 2 TCR V-domain structure (from PDB accession code 1HXM), with all CDRs and HV4 $\gamma$  highlighted. Side chains are displayed for the amino acids of interest (see Figure 4B). (B) Cartoon representation of the BTN3A1 IgV domain structure (from PDB accession code 4F80). The SSLQE, YF and YEKAL motifs are highlighted in orange, blue and red, respectively. Side chains are displayed for the amino acids of interest (see Figure 6C). (C) Representative flow cytometry analysis of CD69 upregulation by JRT3 cells expressing the indicated V $\gamma$ 9V $\delta$ 2 TCR constructs following incubation with media only, or 293T cells with or without pre-treatment with Zoledronate (Zol, 10  $\mu$ M). Related to Figure 6E. (D) Representative flow cytometry analysis of the expression of the indicated FLAG-tagged BTN3A1 constructs (EV, empty vector control) 48 h post-transfection in 293T cells. (E) Representative flow-cytometry analysis of CD107a upregulation by polyclonal V $\gamma$ 9V $\delta$ 2 T cell lines derived from PBMCs from two donors following co-culture with CRA123 cells transfected with the indicated BTN3A1 constructs or empty vector control (EV) and pre-treated with 10  $\mu$ M Zol. (F) Representative flow-cytometry analysis of the expression of the indicated FLAG-tagged BTN3A1 and HA-tagged BTN3A2 constructs or empty vector control (EV) 48 h post-co-transfection in 293T cells. (G) Representative flow-cytometry analysis of CD107a upregulation by a polyclonal V $\gamma$ 9V $\delta$ 2 T cell line following co-culture with CRA123 cells co-transfected with the indicated BTN3A1 and BTN3A2 constructs or empty vector control (EV) and pre-treated with 10  $\mu$ M Zol. Related to Figure 5G. (H,I) Flow-cytometry analysis of CD69 upregulation by JRT3 cells expressing a wild-type V $\gamma$ 9V $\delta$ 2 TCR following co-culture with CRA123 cells co-transfected with the indicated BTN3A1 and BTN3A2 constructs or empty vector control (EV) and pre-treated with 10  $\mu$ M Zol. Data in (H) are representative of two independent experiments (mean  $\pm$  s.d. of  $n = 3$  co-cultures). Corresponding representative flow-cytometry plots are shown in (I).
